# Supplementary material for: Metal-free regioselective construction of indolin-3-ones via hypervalent iodine oxidation of N-substituted indoles
Source: Royal Society of Chemistry journal article supplement (doi:10.1039/c6ra19741h), 2016-01-01

## Metal-free regioselective construction of indolin-3-ones *via* hypervalent iodine oxidation of *N*-substituted indoles

Chao Yang,<sup>a</sup> Guanyun Cheng<sup>a</sup>, Baofu Huang<sup>c</sup>, Fengtian Xue<sup>b\*</sup> and Chao Jiang<sup>a\*</sup>

<sup>a</sup> *Department of Pharmaceutical Engineering, School of Chemical Engineering, Nanjing University of Science and Technology, Nanjing, Jiangsu 210094, China*

<sup>b</sup> *Department of Pharmaceutical Sciences, University of Maryland School of Pharmacy, 20 Penn Street, Baltimore, Maryland 21201, United States*

<sup>c</sup> *Nanjing Perlong Medical Equipment Co., Ltd., 989 East Qingshuiting Road, Jiangning Development Zone, Nanjing, Jiangsu 211102, China*

## Supporting Information

### 1 General remarks

### 2 <sup>1</sup>H and <sup>13</sup>C NMR spectra of products

#### General remarks

All reagents and metal catalysts were obtained from commercial sources without further purification. Analytical thin layer chromatography (TLC) was performed on precoated silica plates. Yields of the products refer to purification by silica-gel column chromatography. Silica gel 60H (200-300 mesh) manufactured by Qingdao Haiyang Chemical Group Co. (China) was used for general chromatography. Mass spectra were recorded with an TSQ Quantum-LC/MS/MS of Finnigan using Electrospray ionization (ESI) techniques. <sup>1</sup>H and <sup>13</sup>C NMR spectra were recorded with a Bruker AV-300 and AV-500 spectrometer operating at 300MHz/500MHz and 75MHz/125MHz, respectively, with chemical shift values being reported in ppm relative to chloroform ( $\delta$ =7.26 ppm) for <sup>1</sup>H NMR, and chloroform ( $\delta$ =77.16 ppm) for <sup>13</sup>C NMR.

# <sup>1</sup>H and <sup>13</sup>C NMR spectra of products

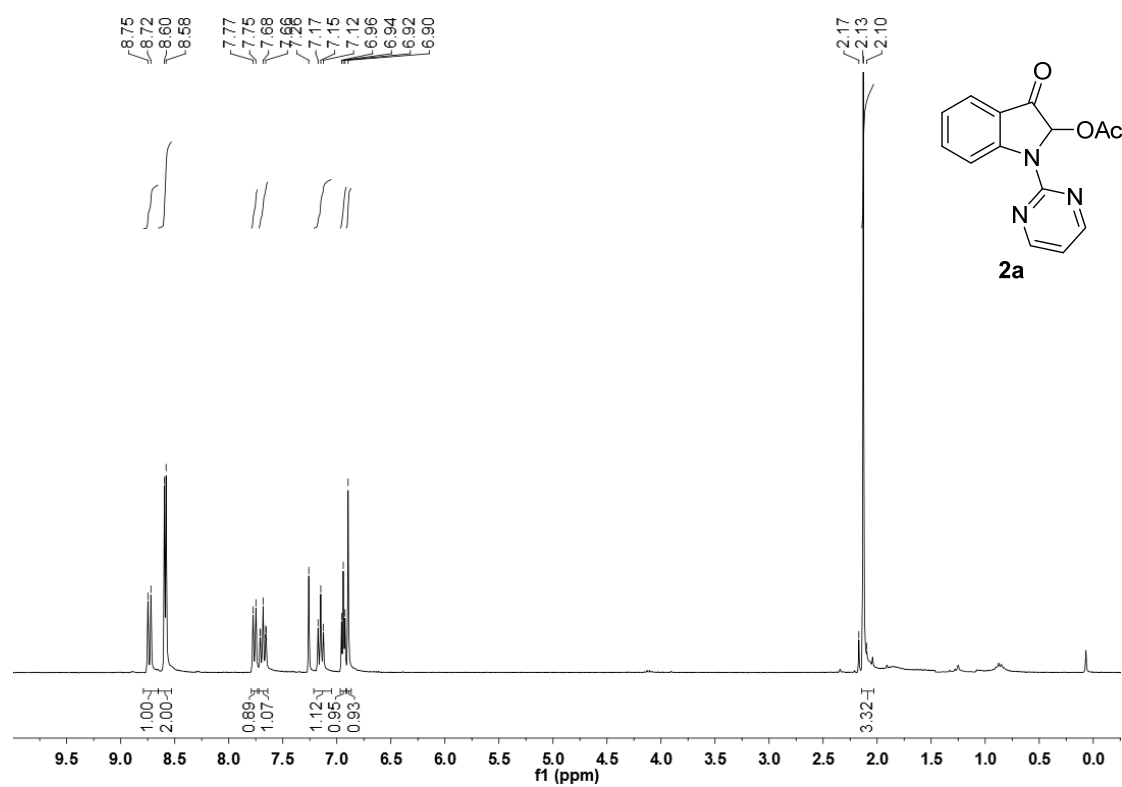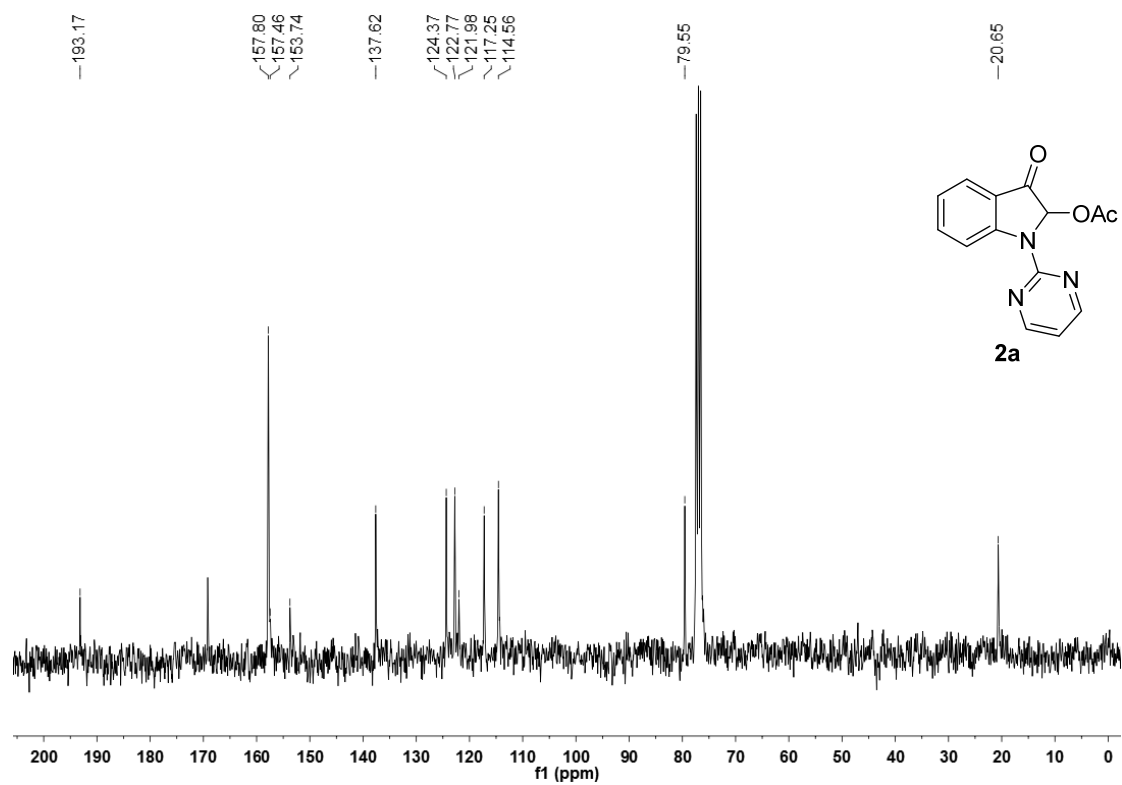

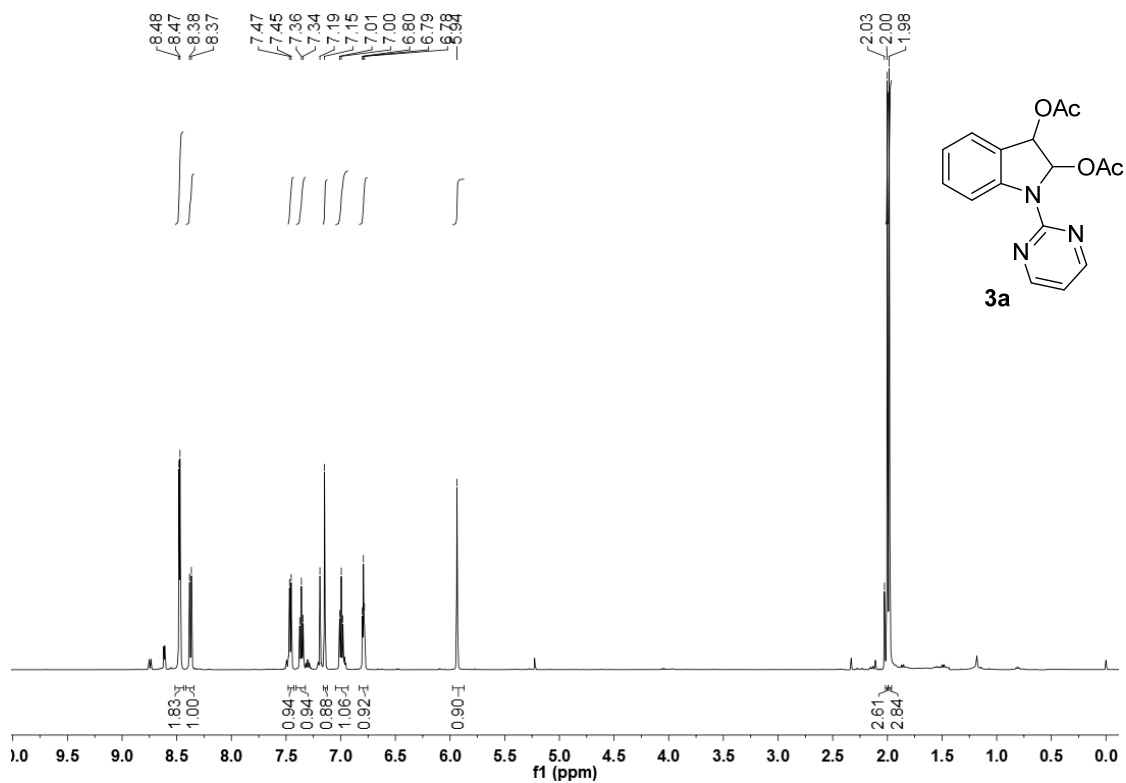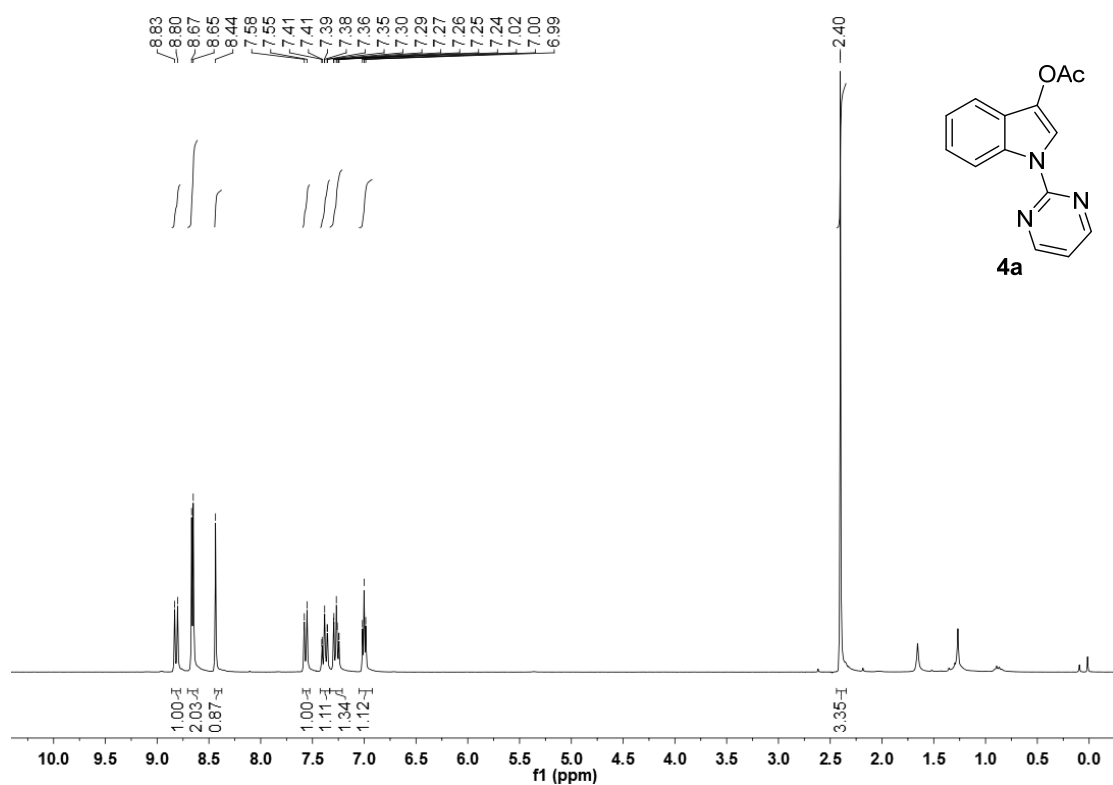

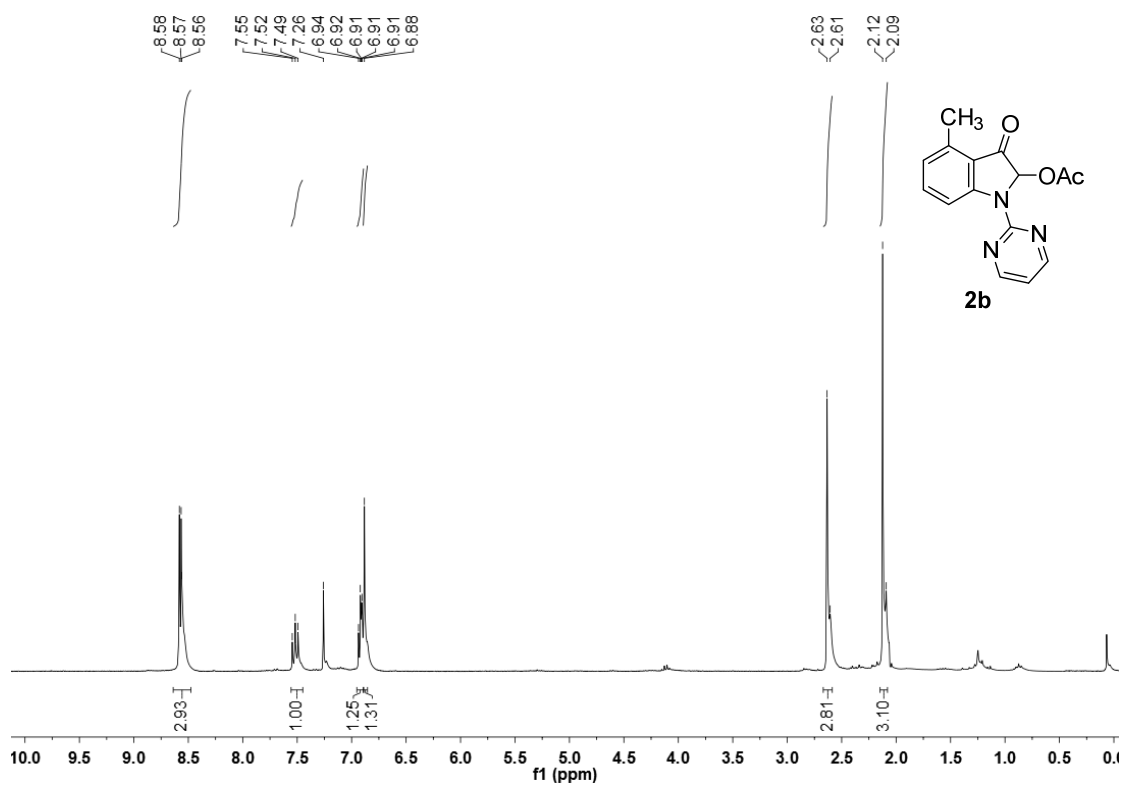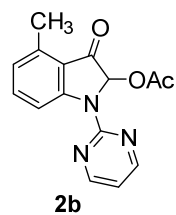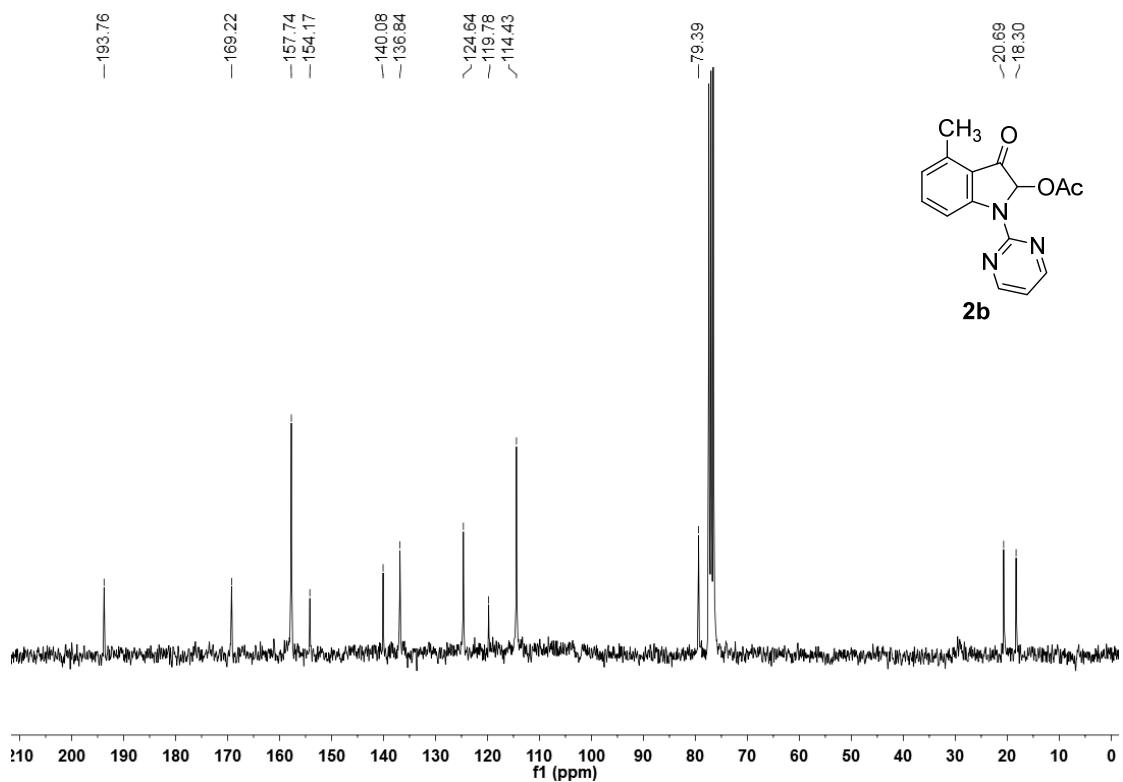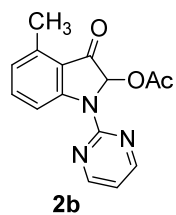

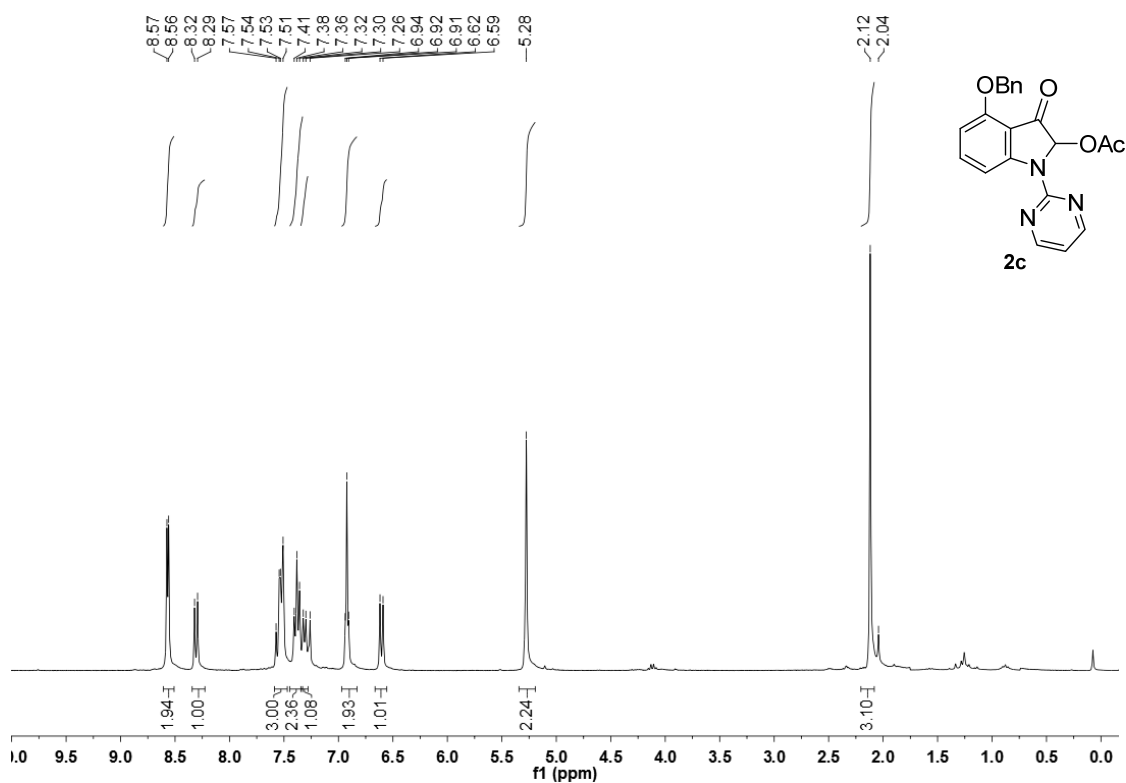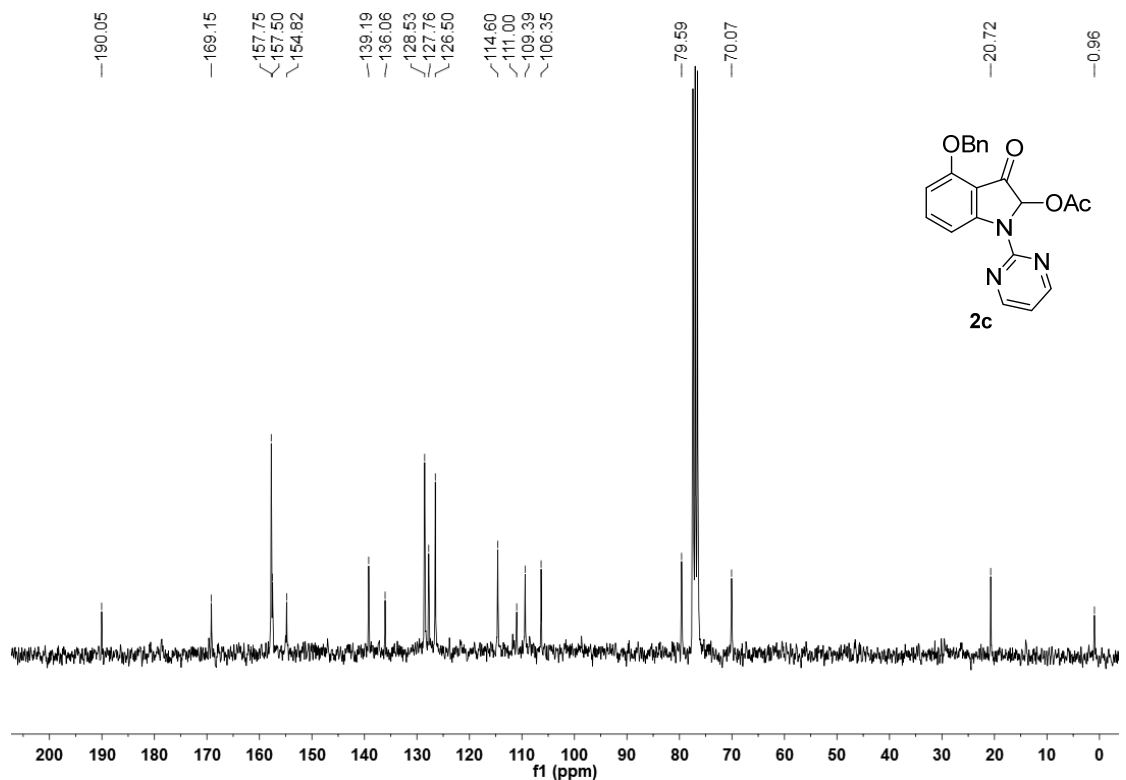

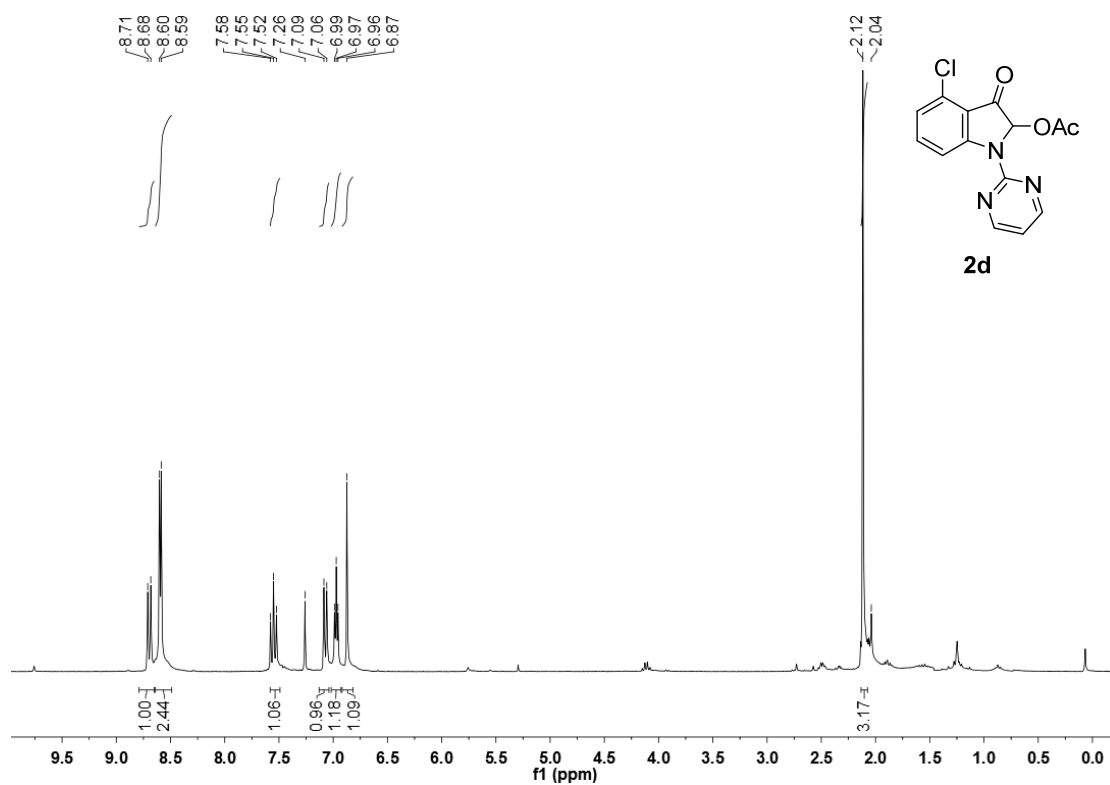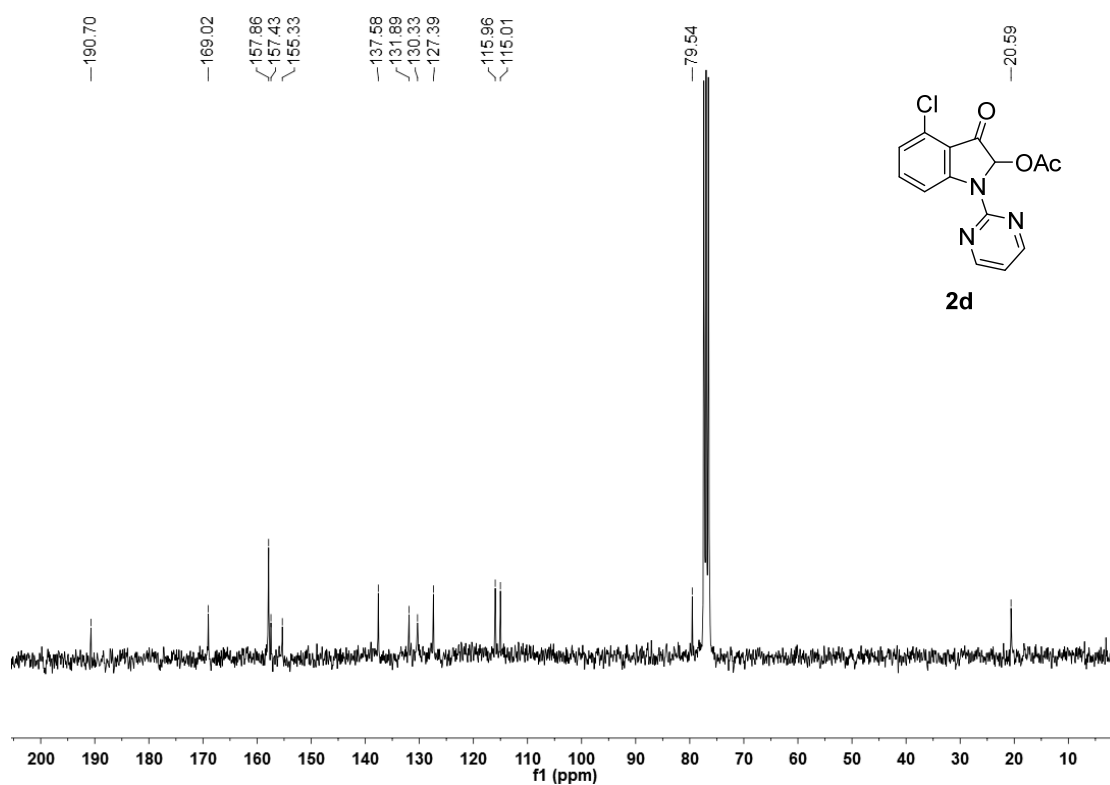

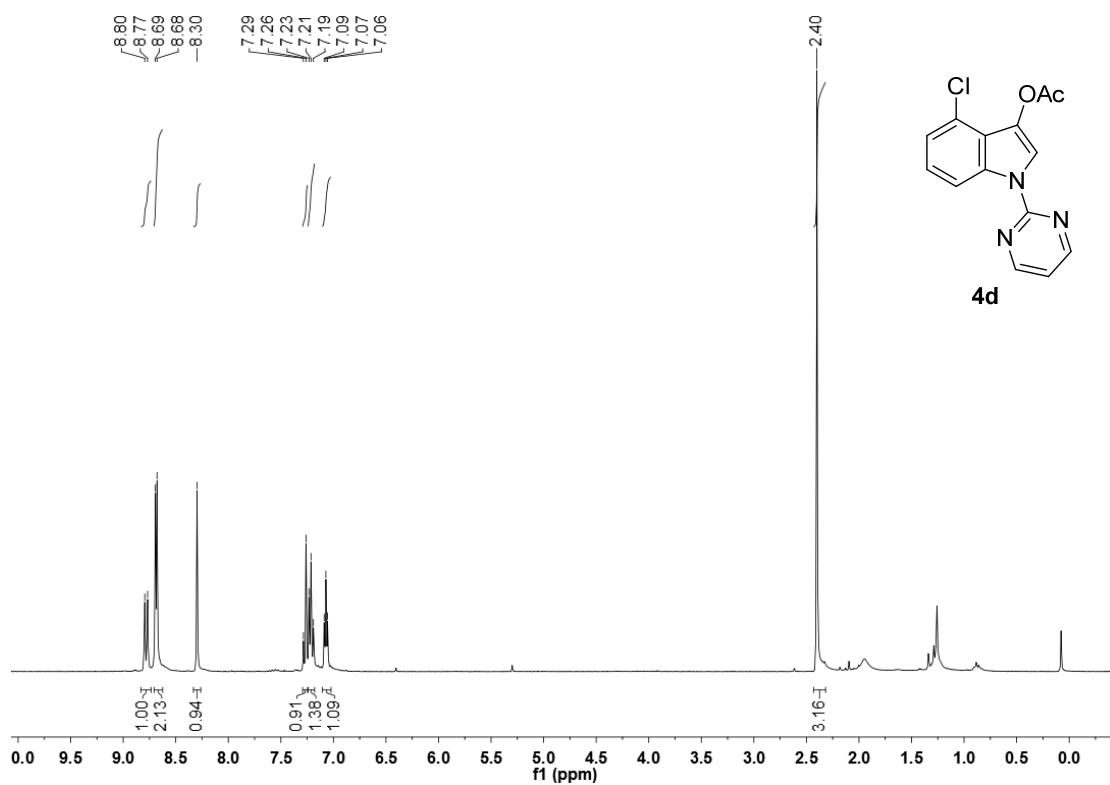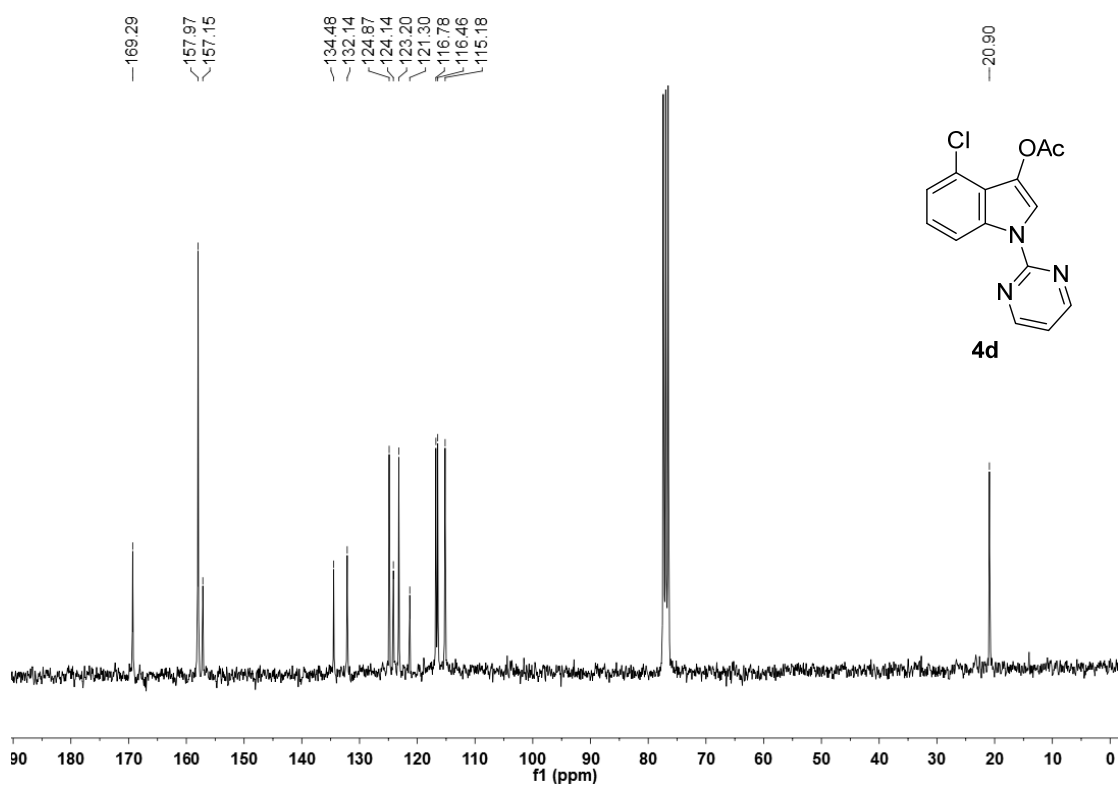

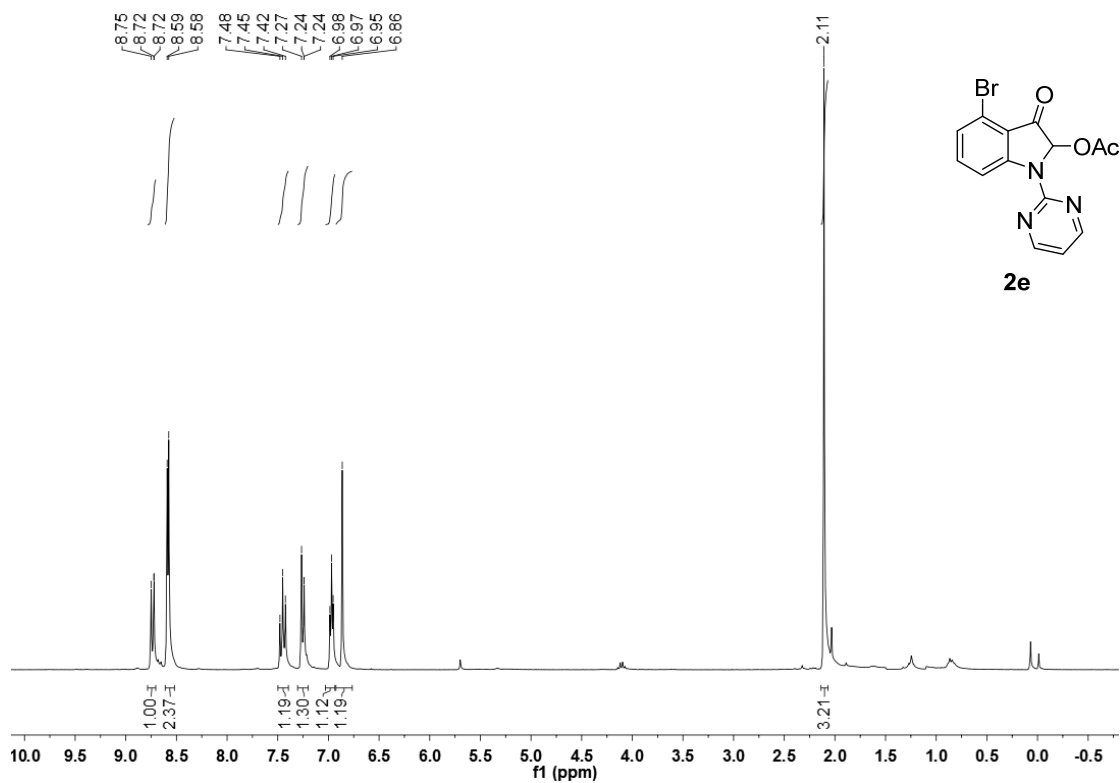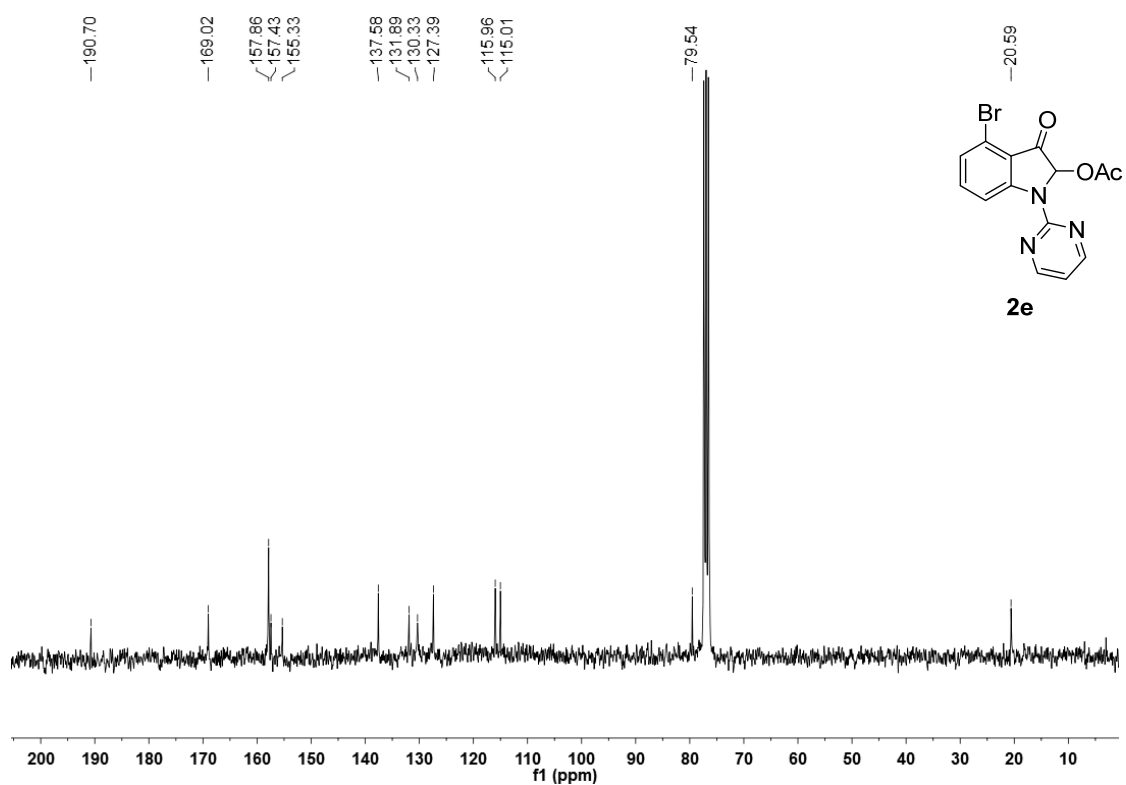



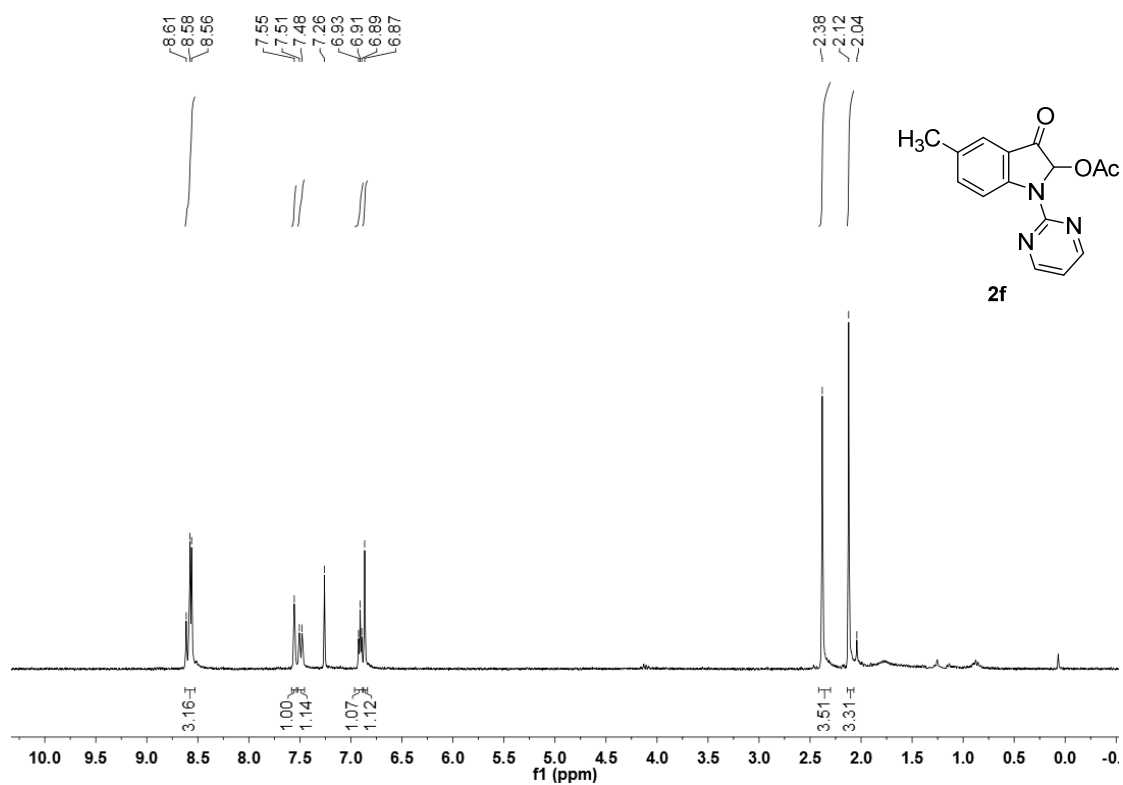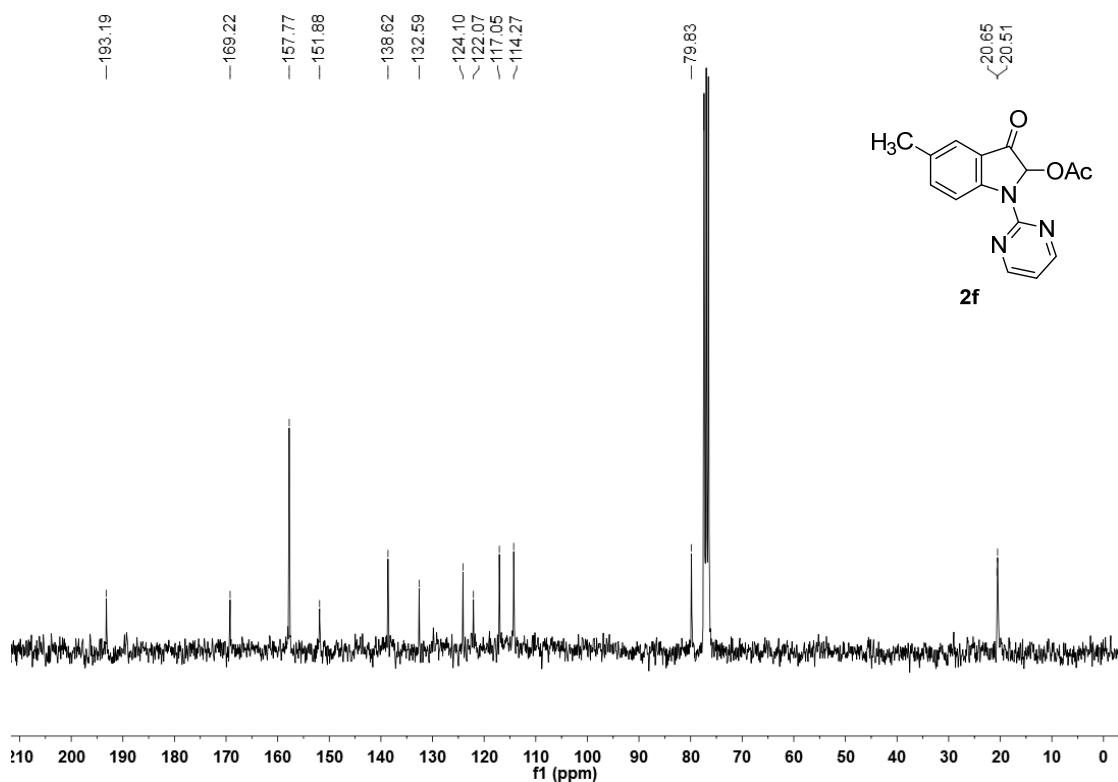

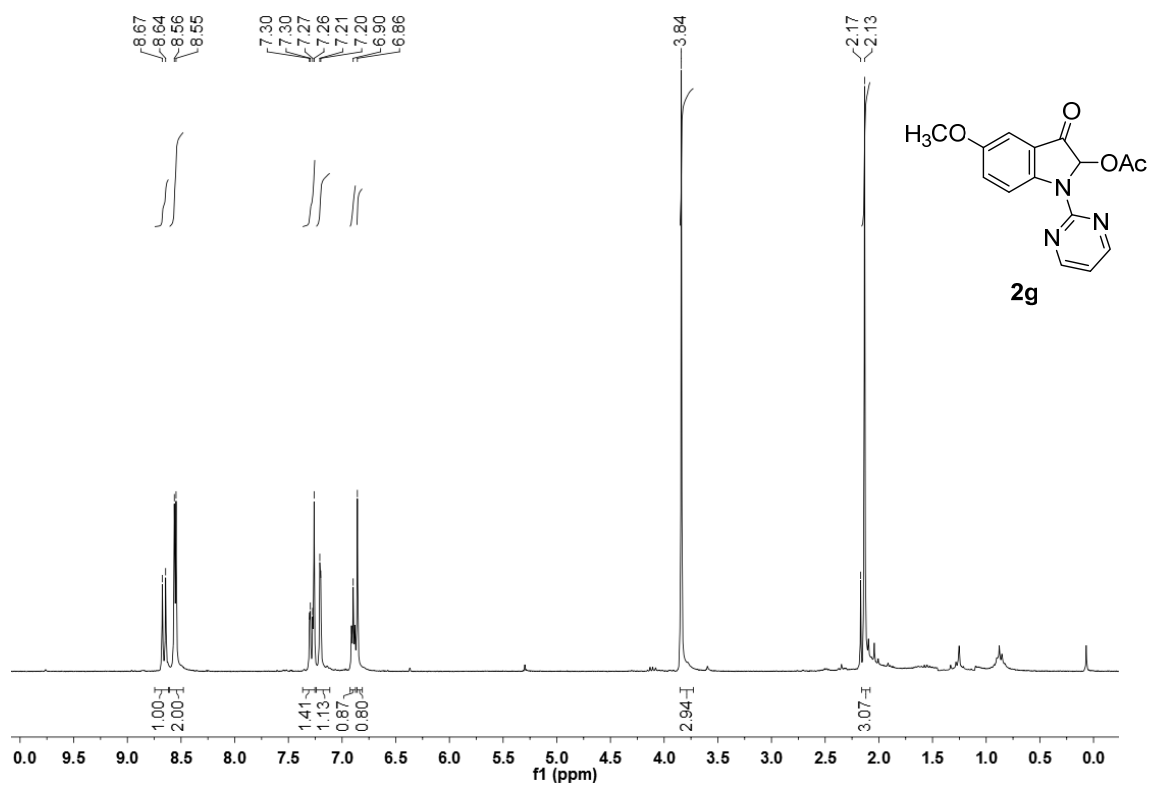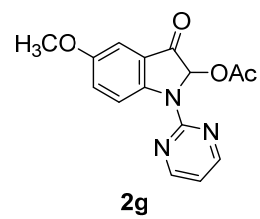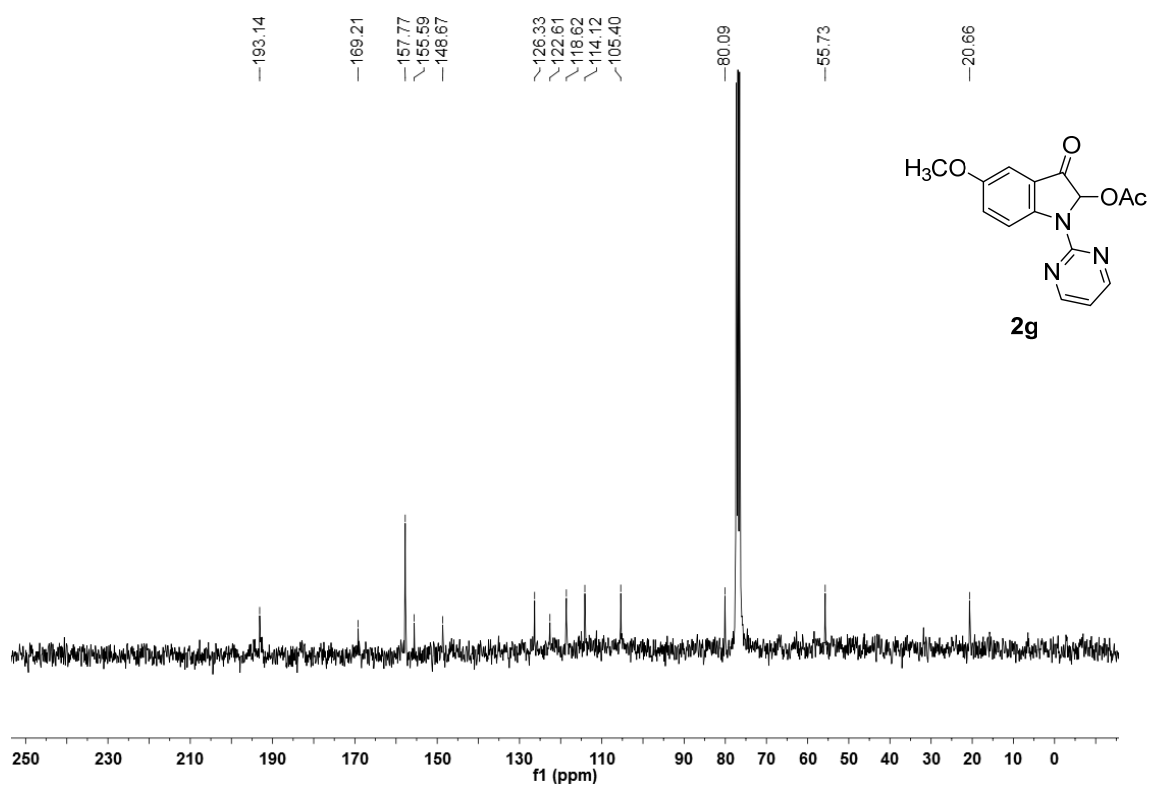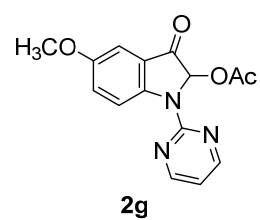

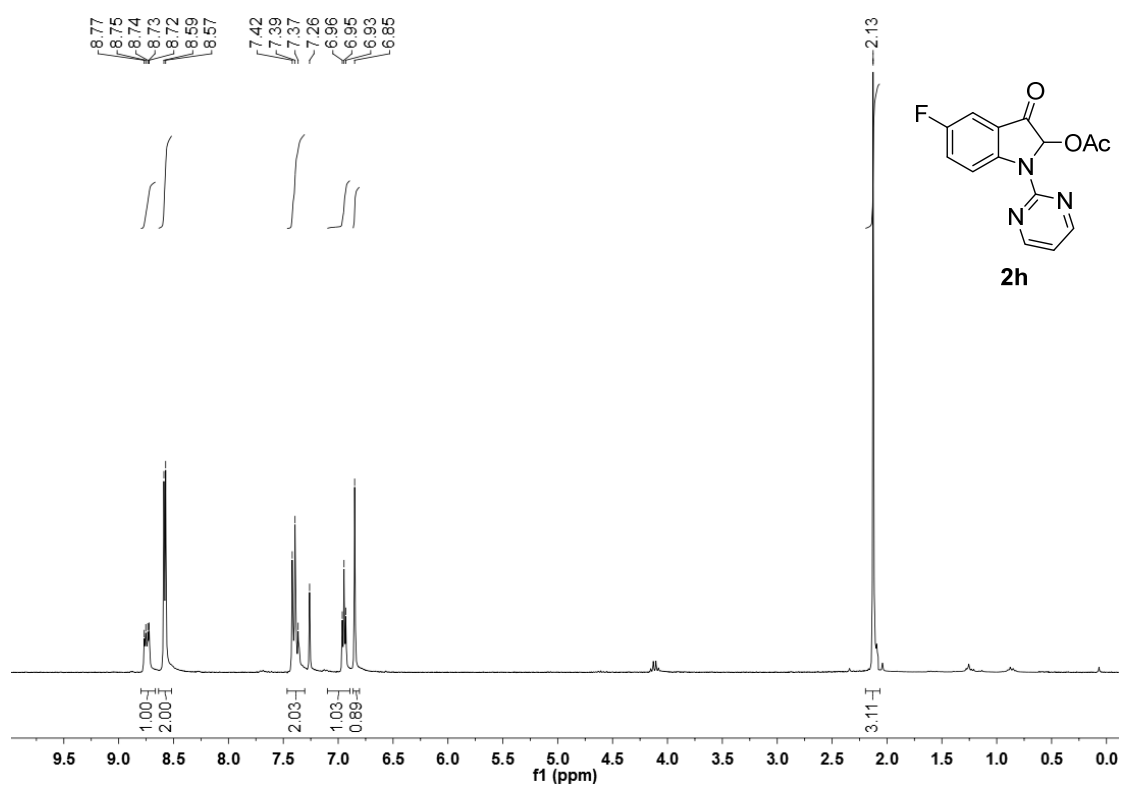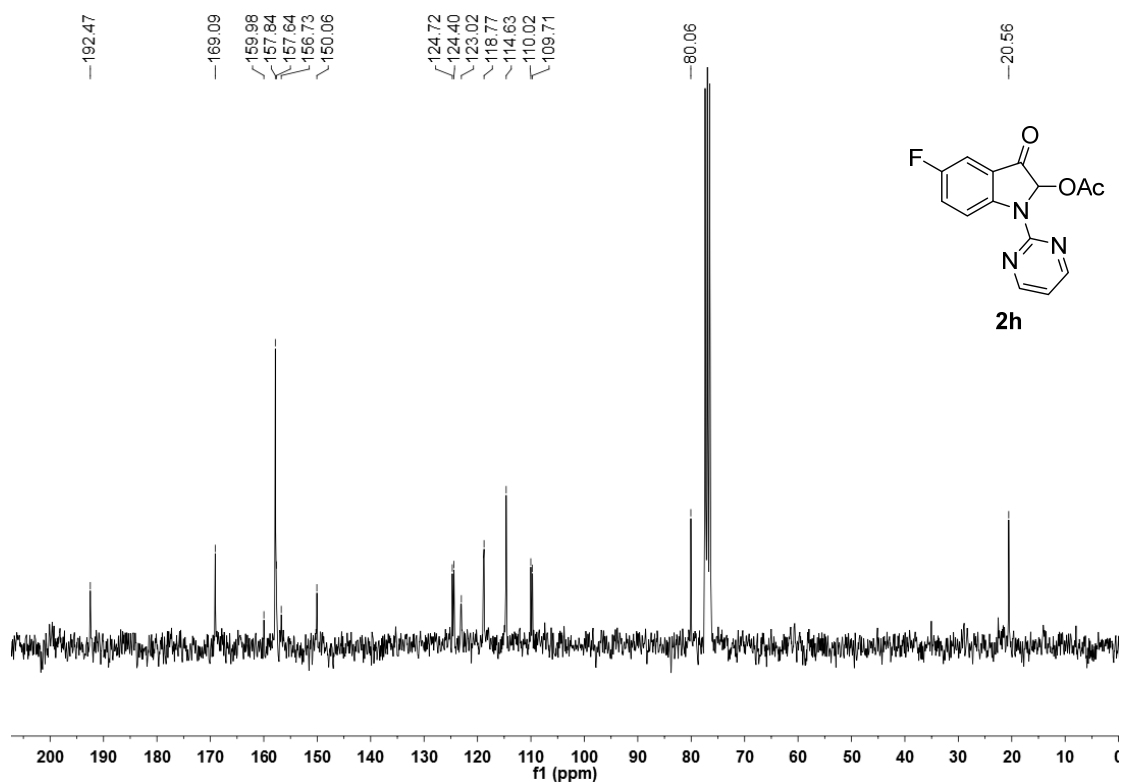

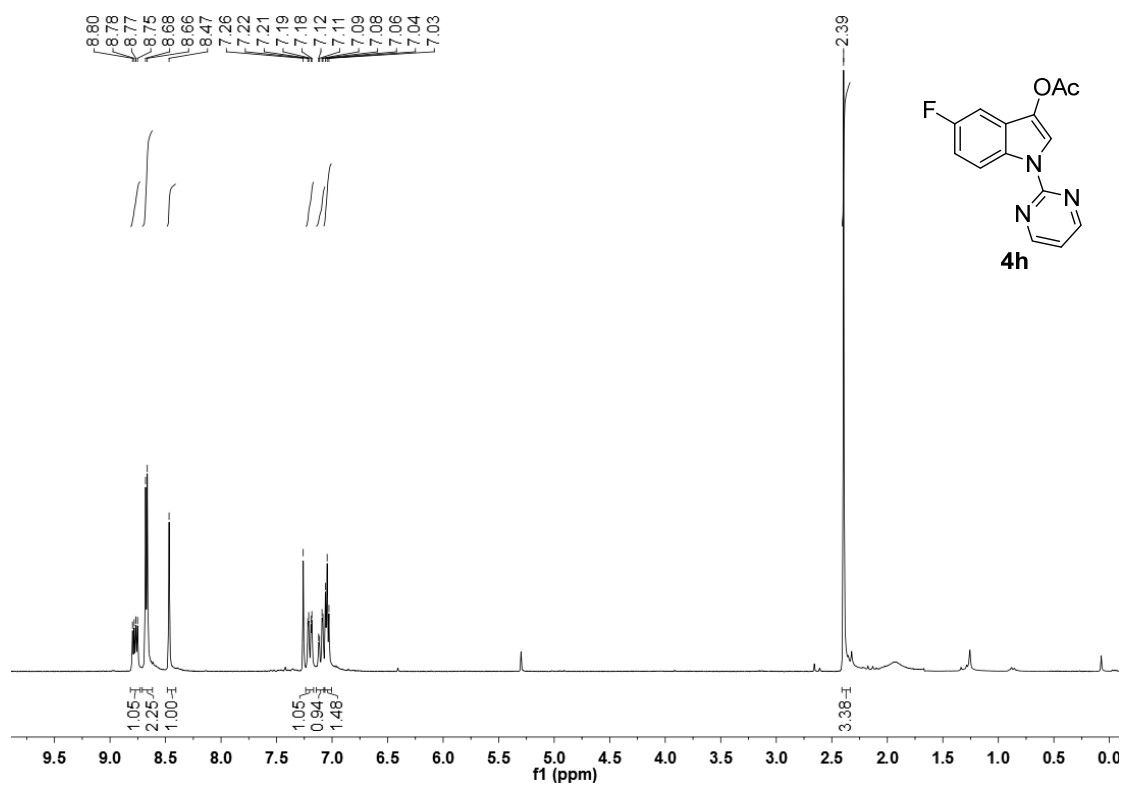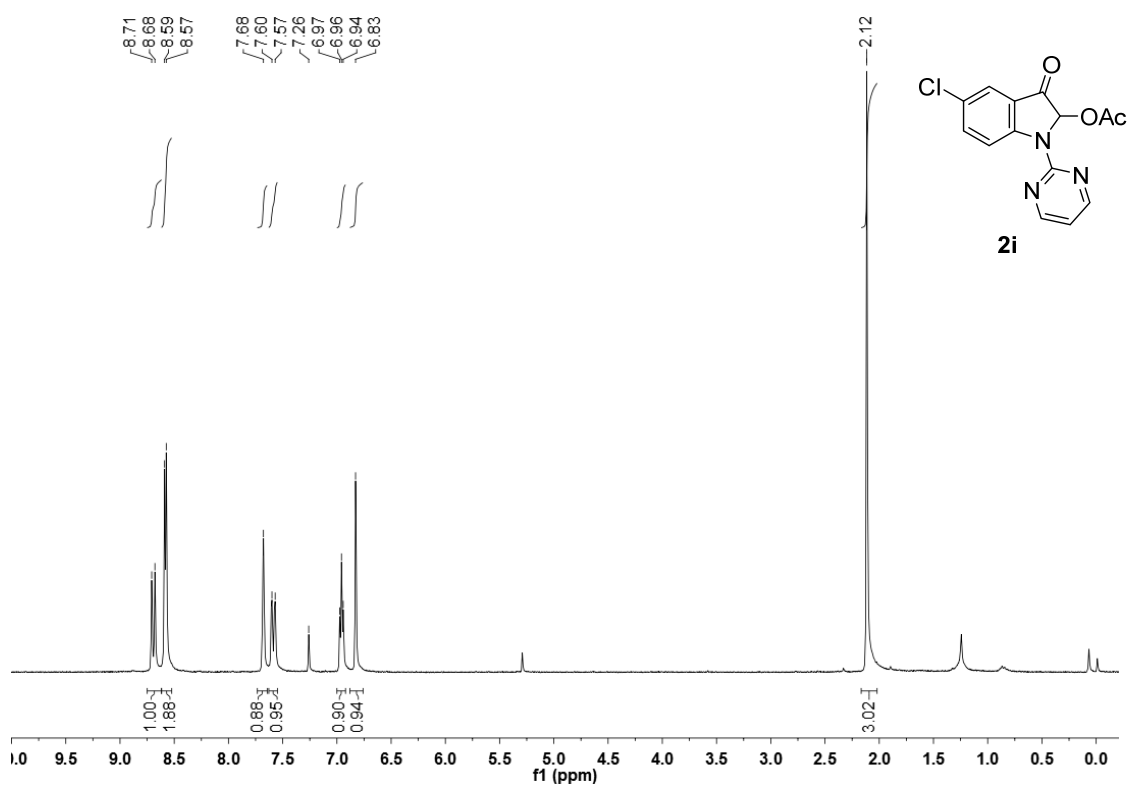

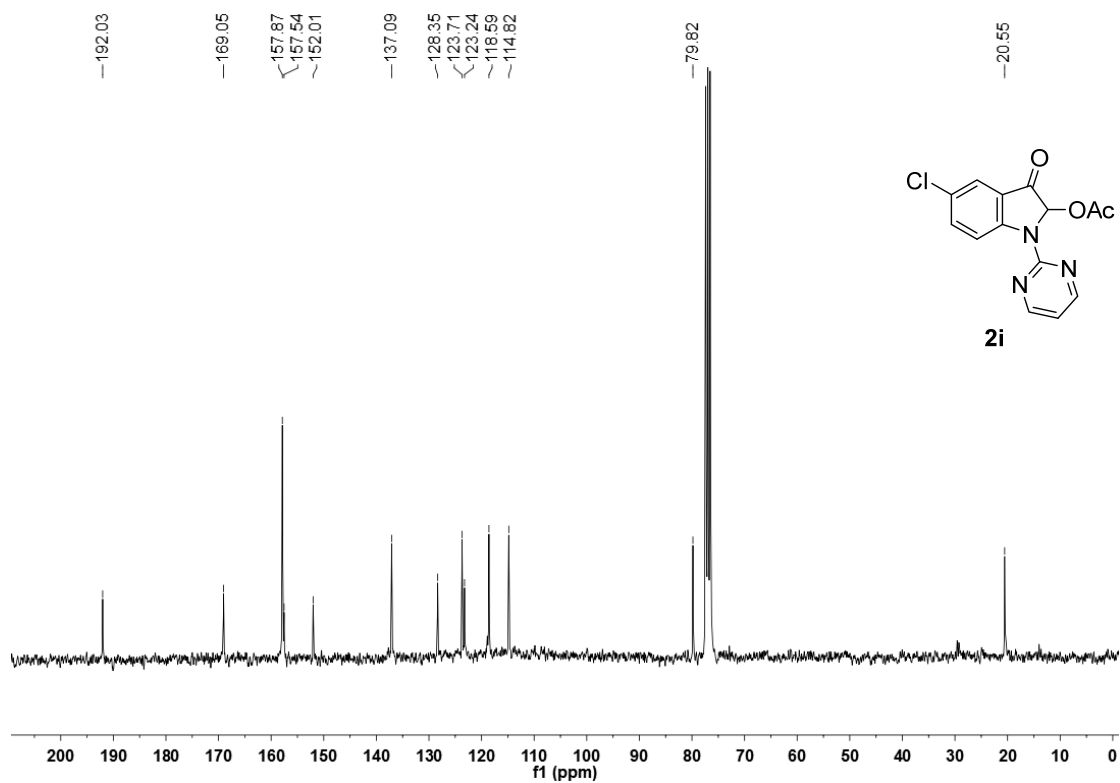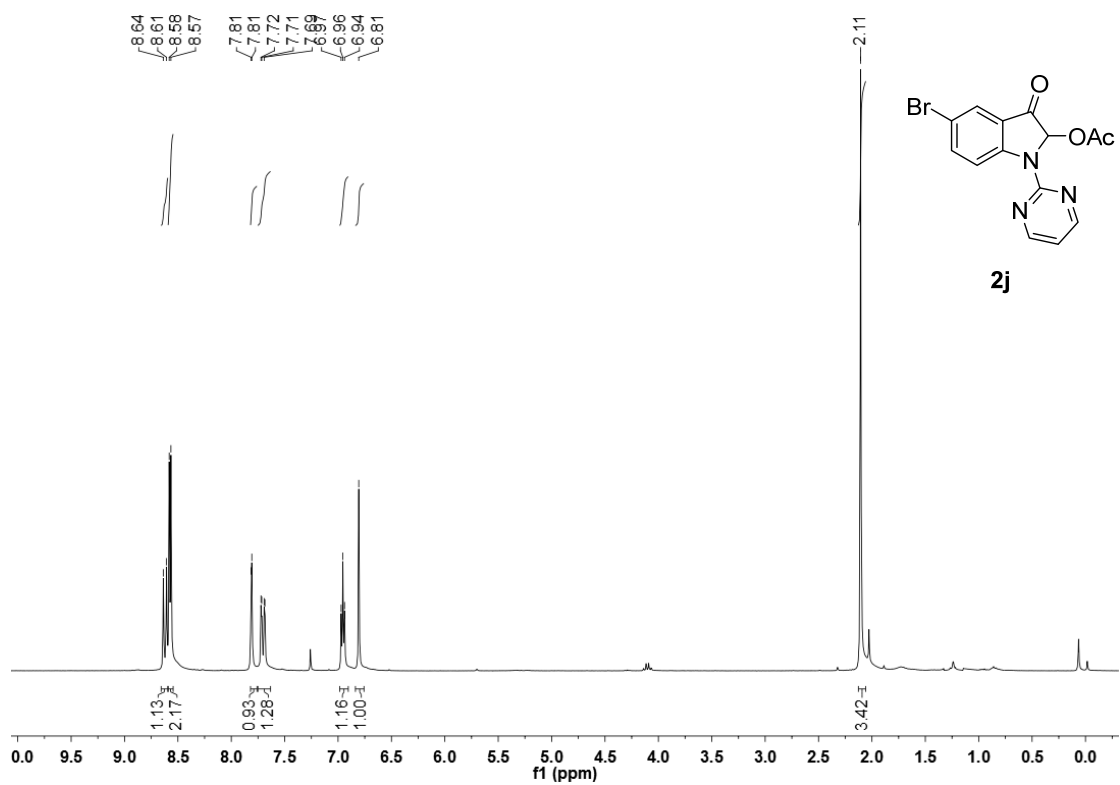

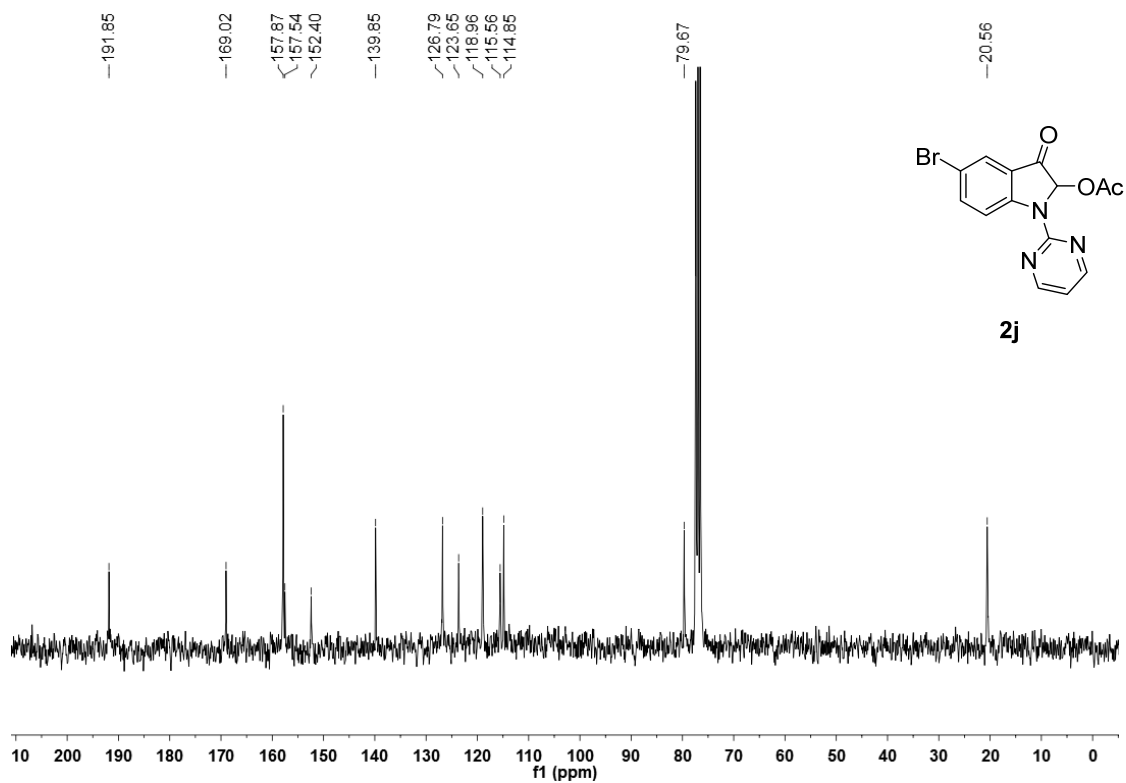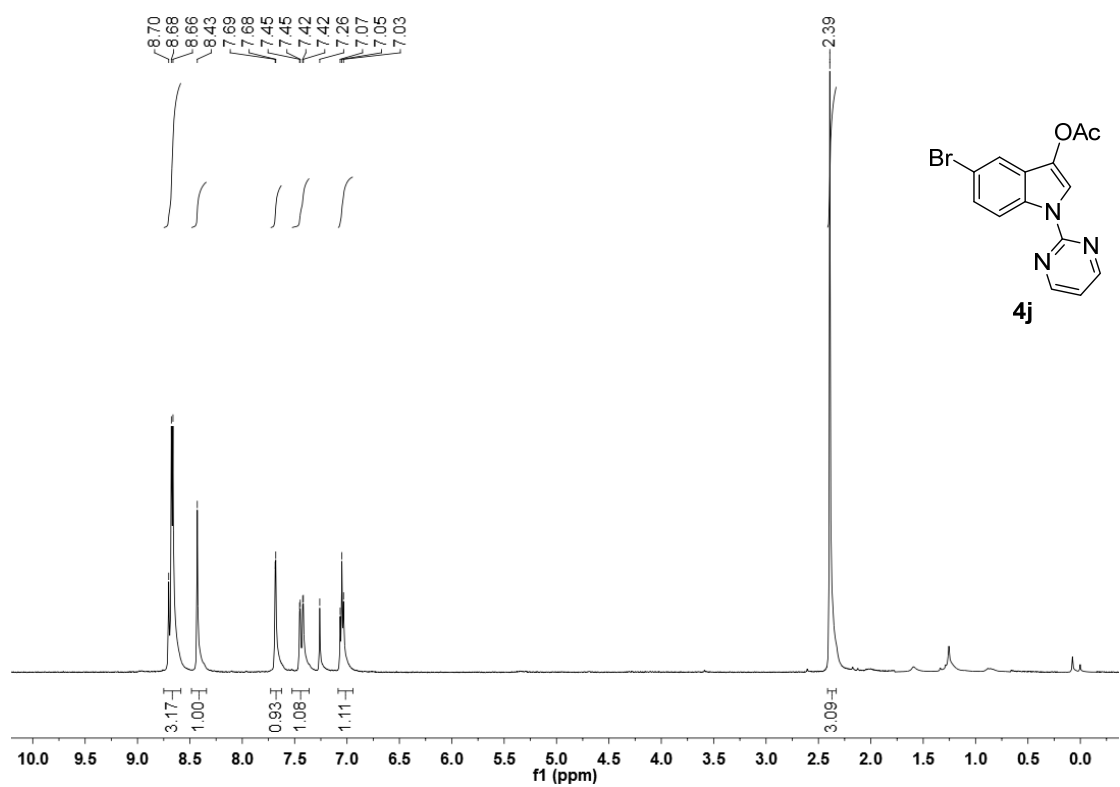

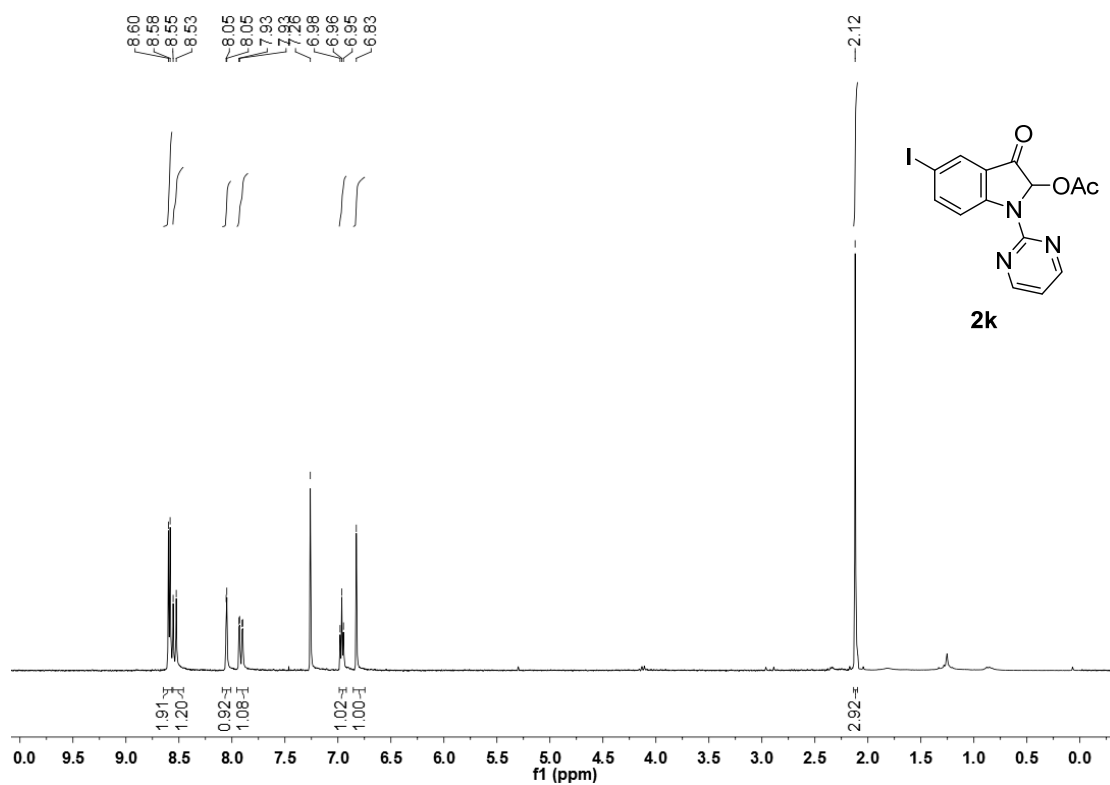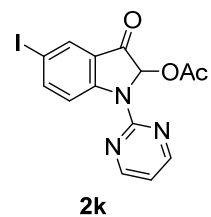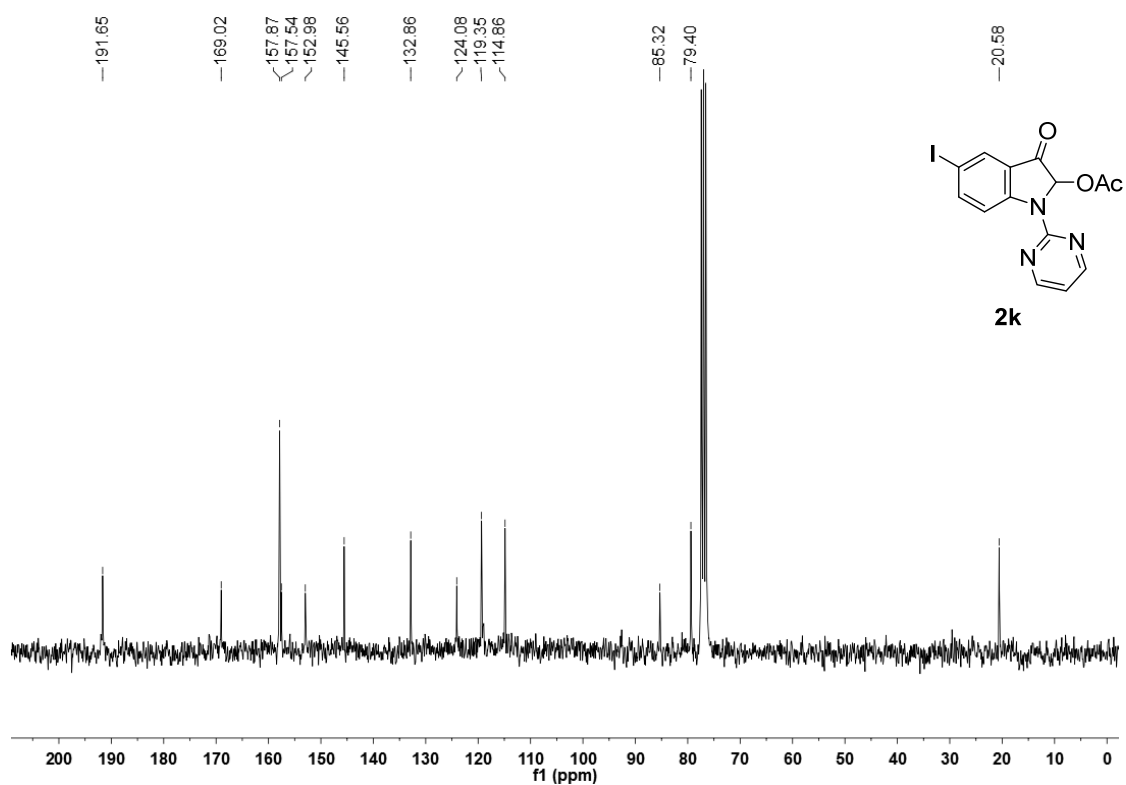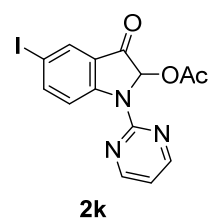

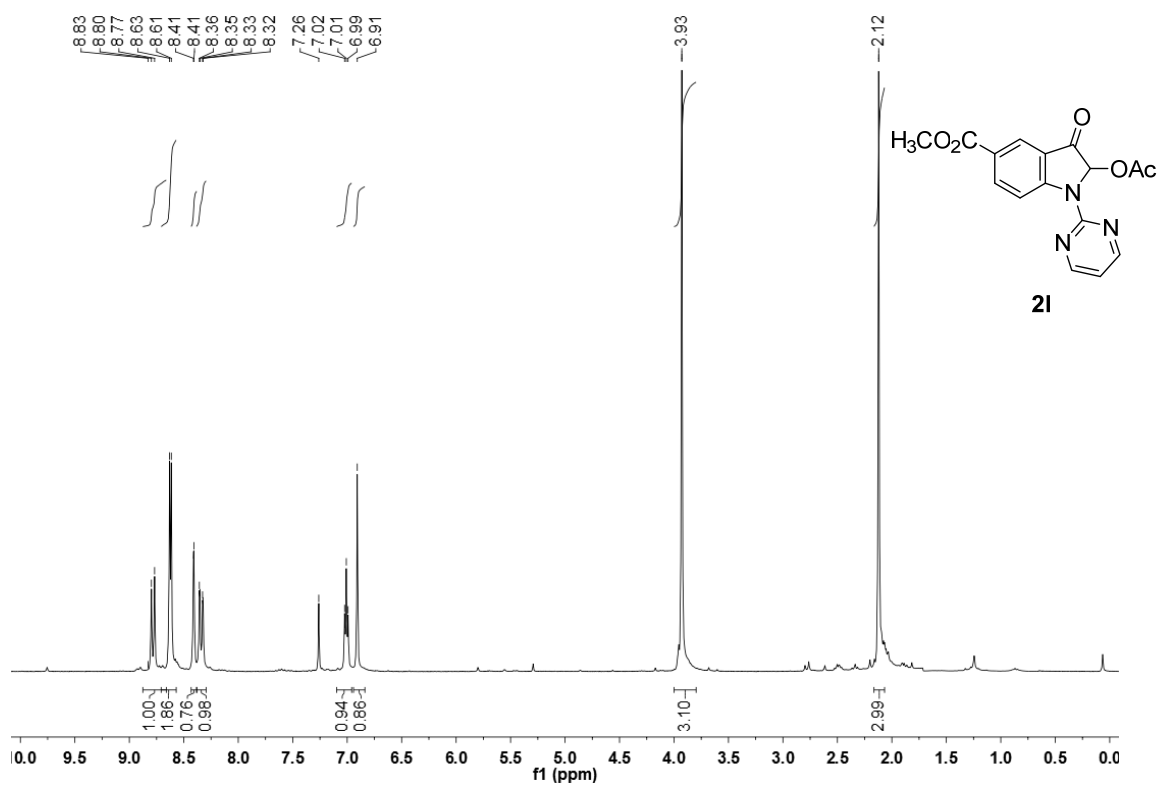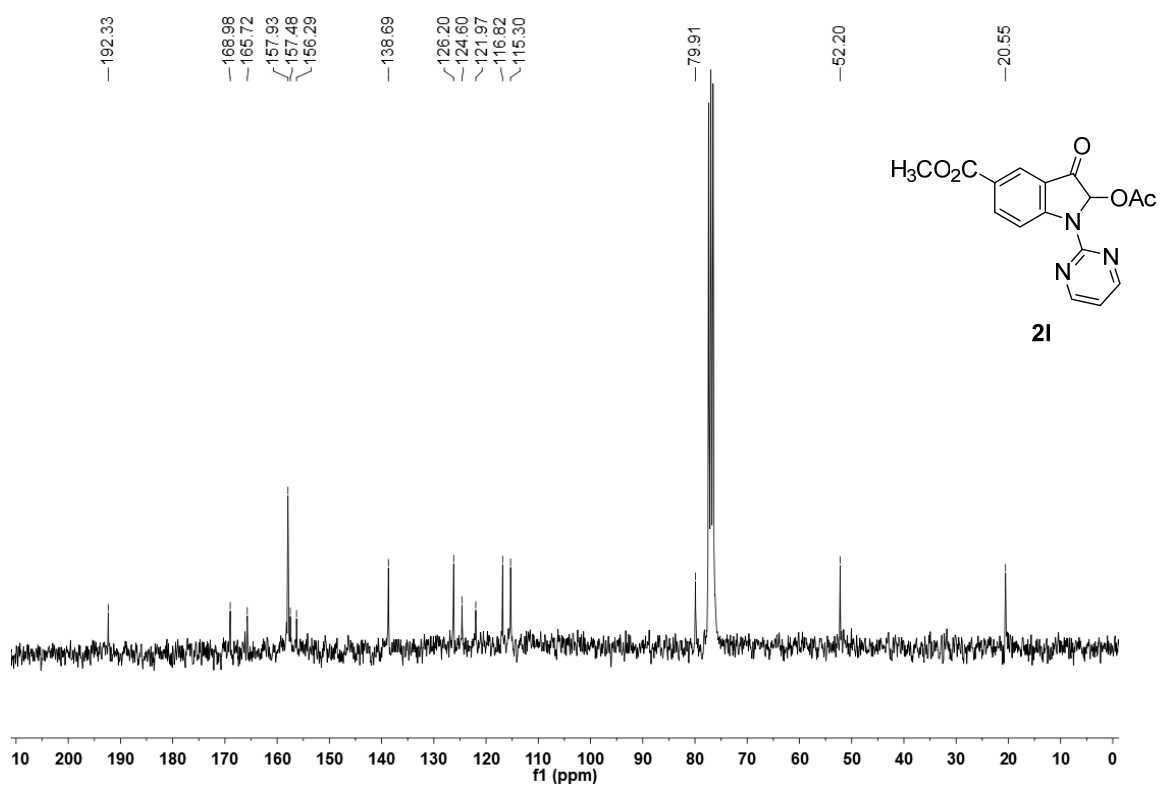



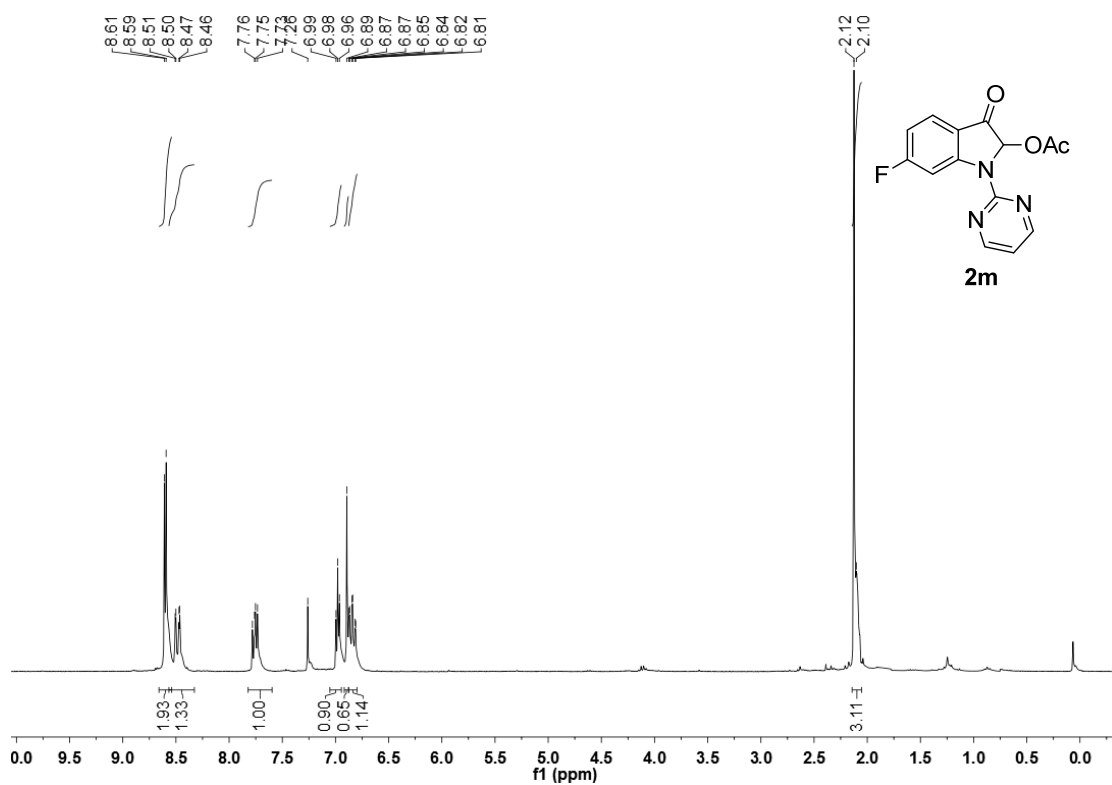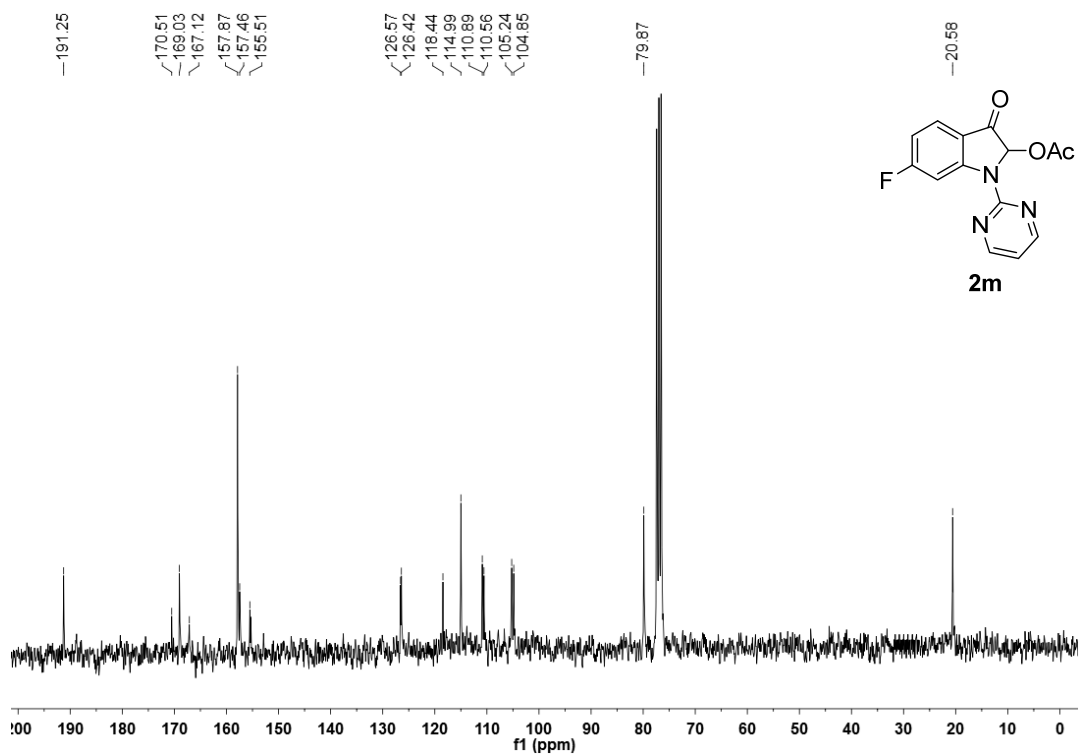

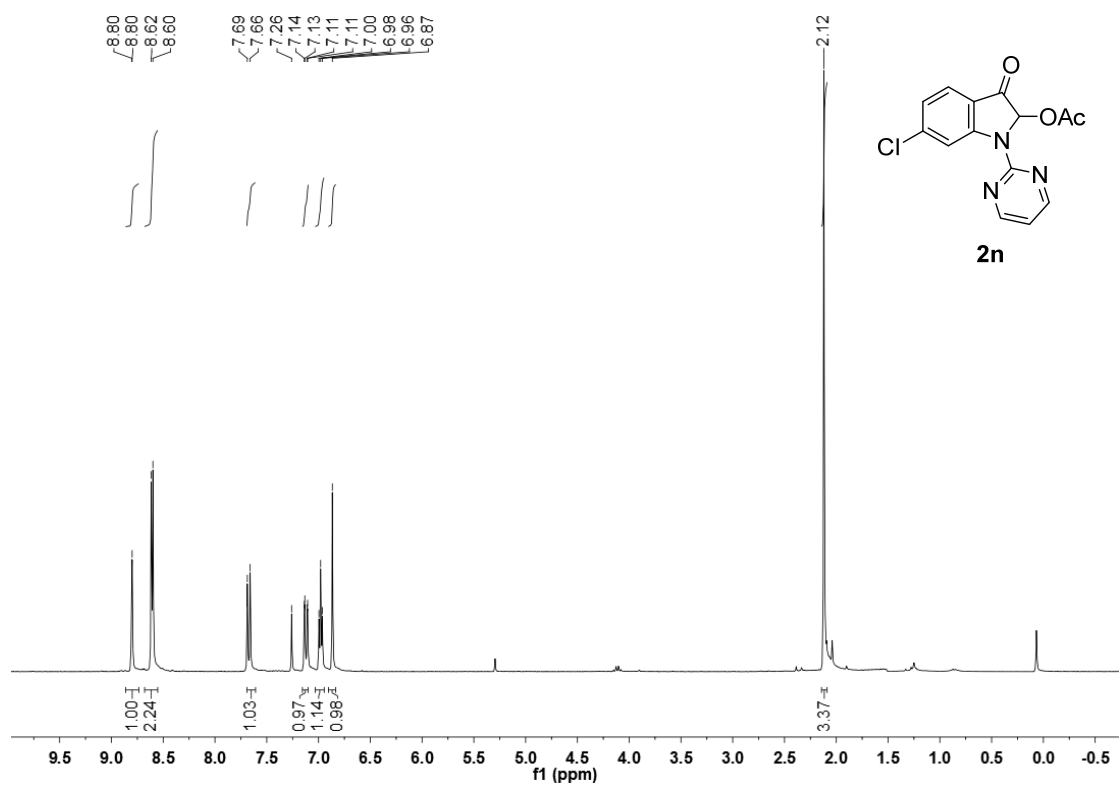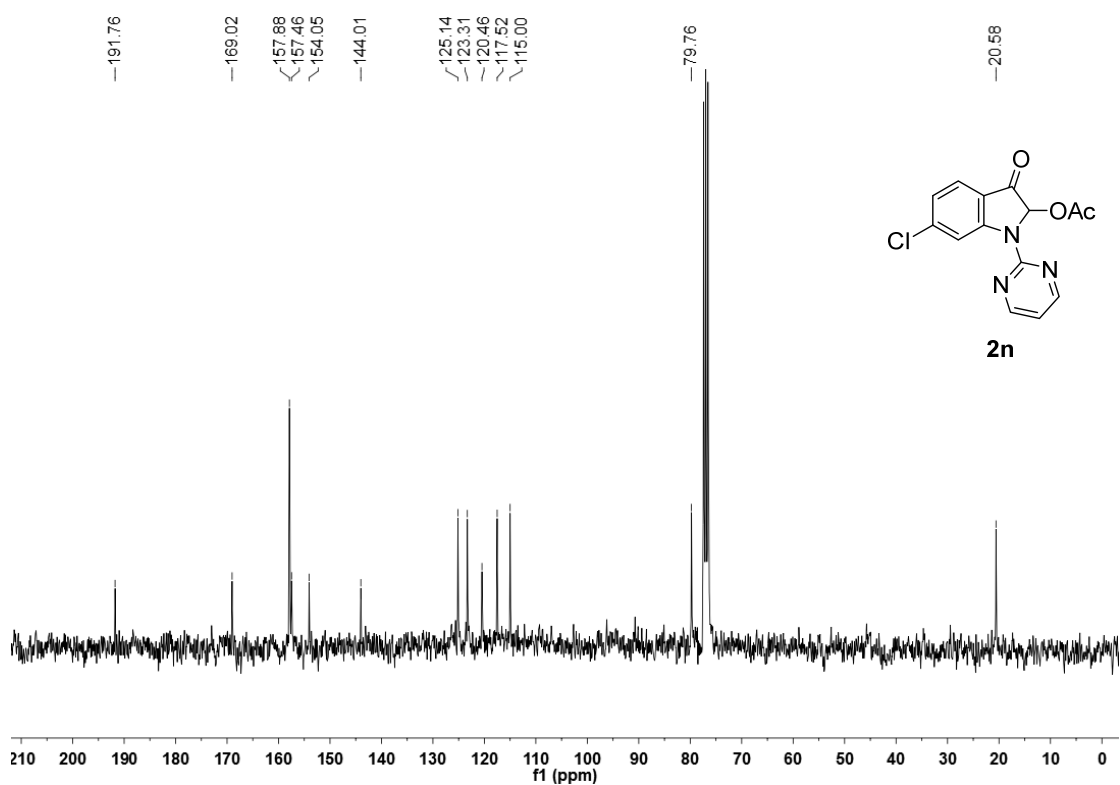

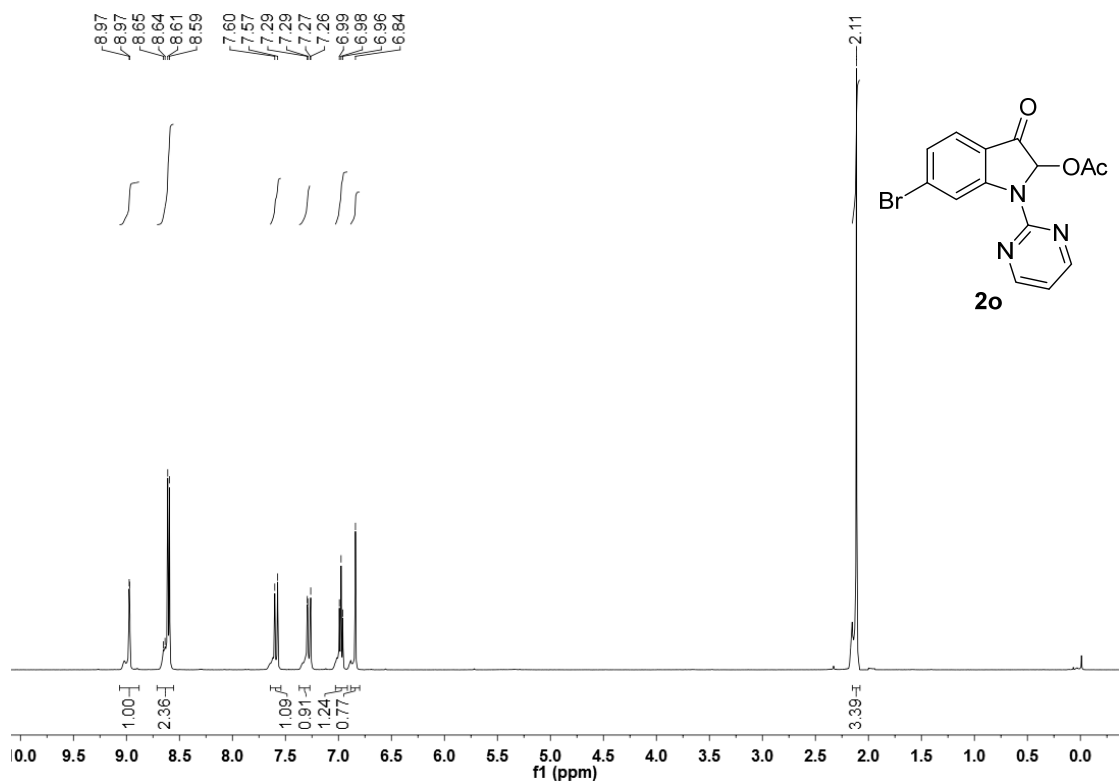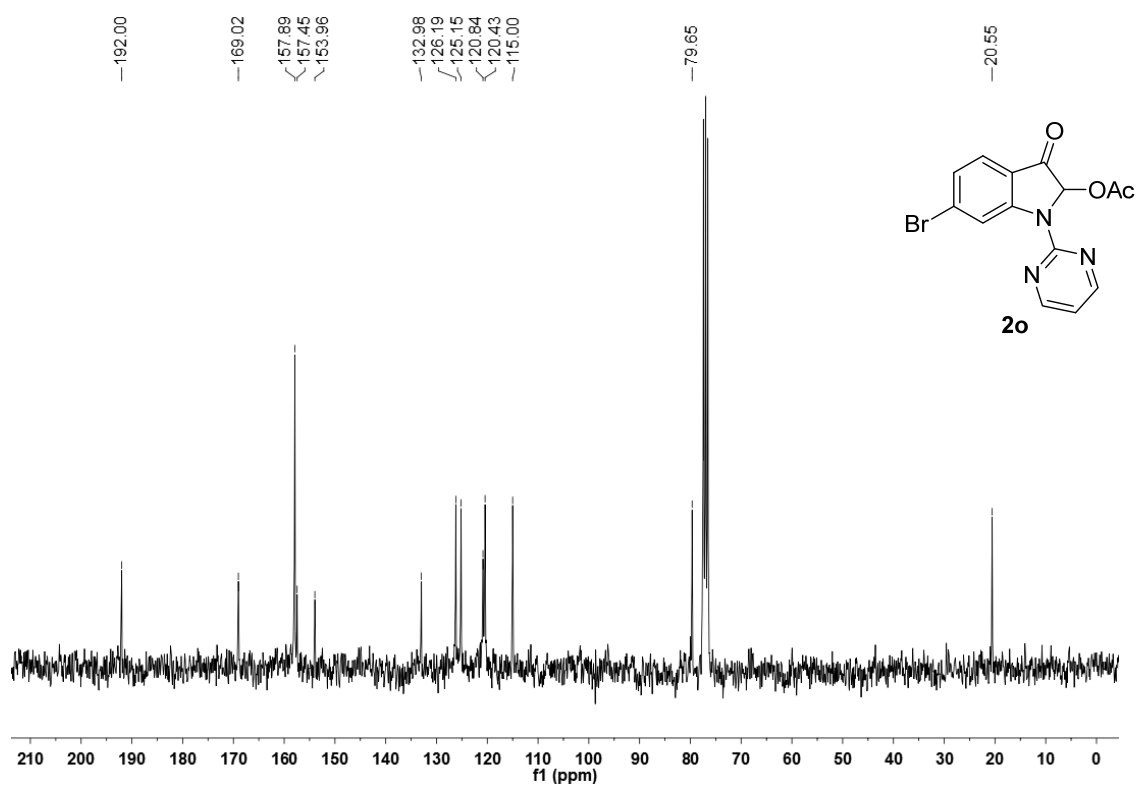

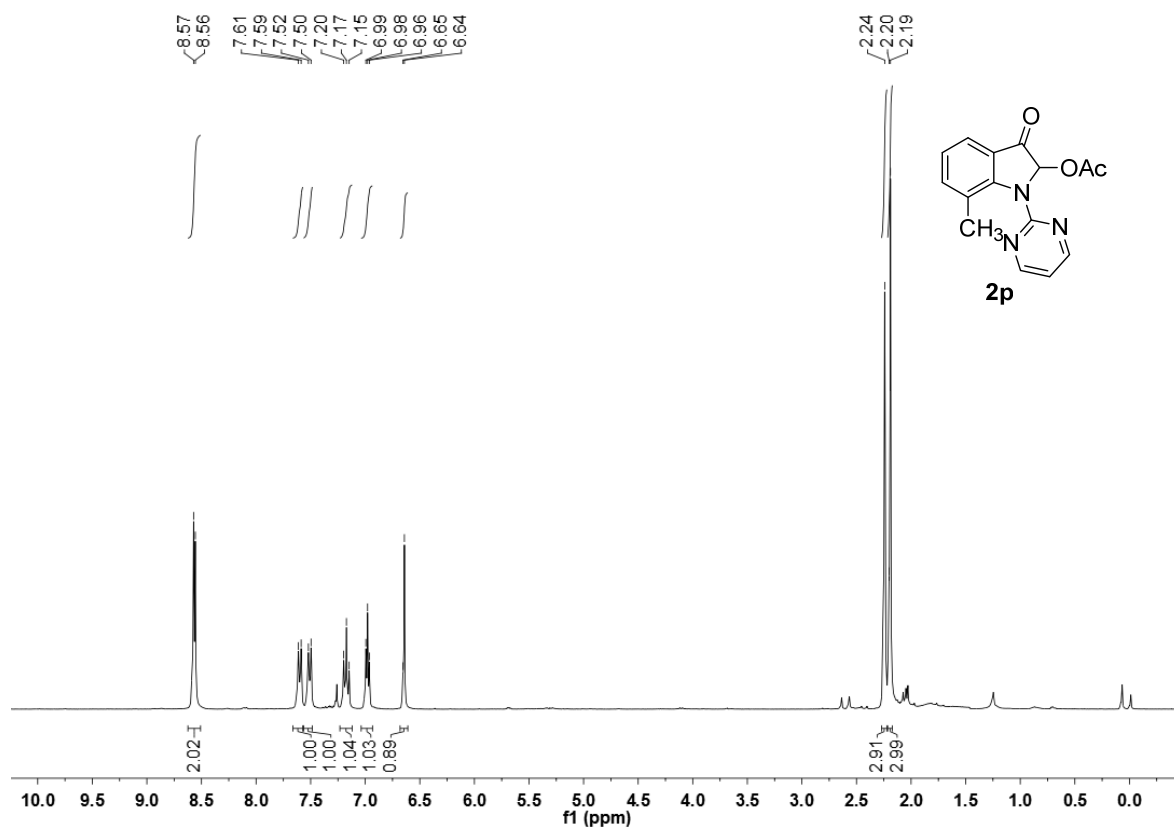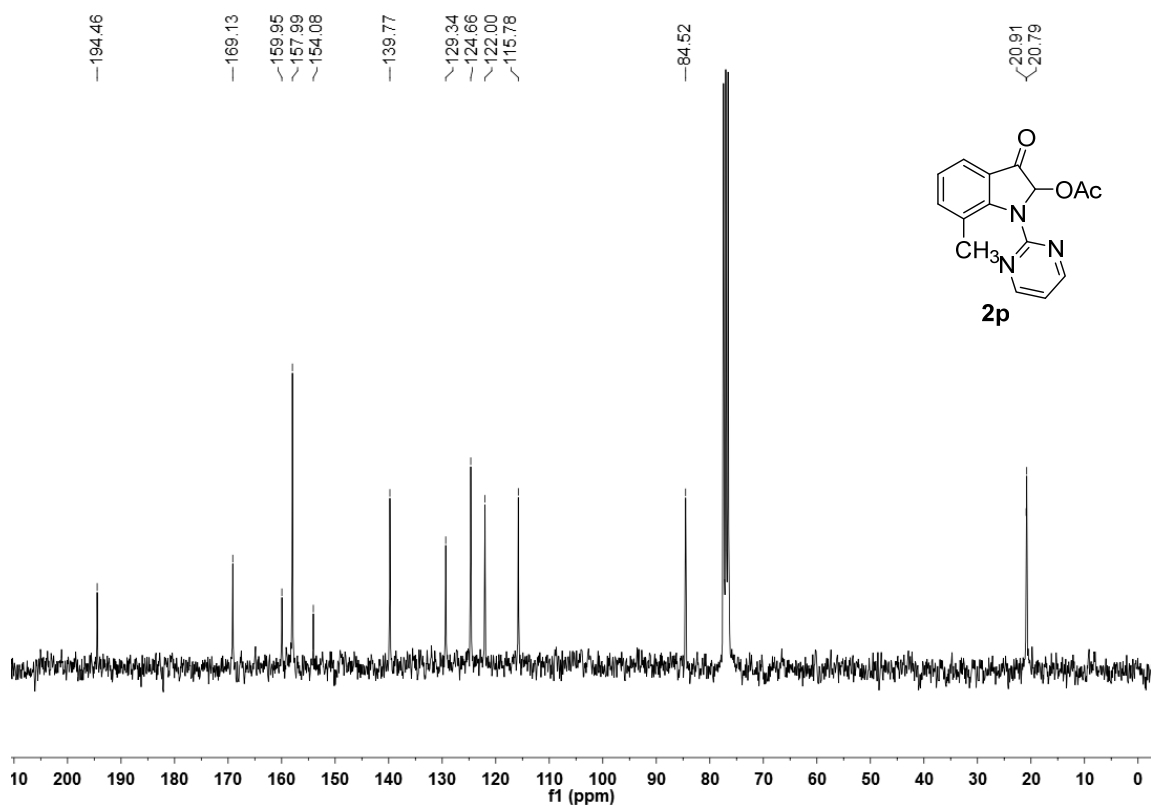

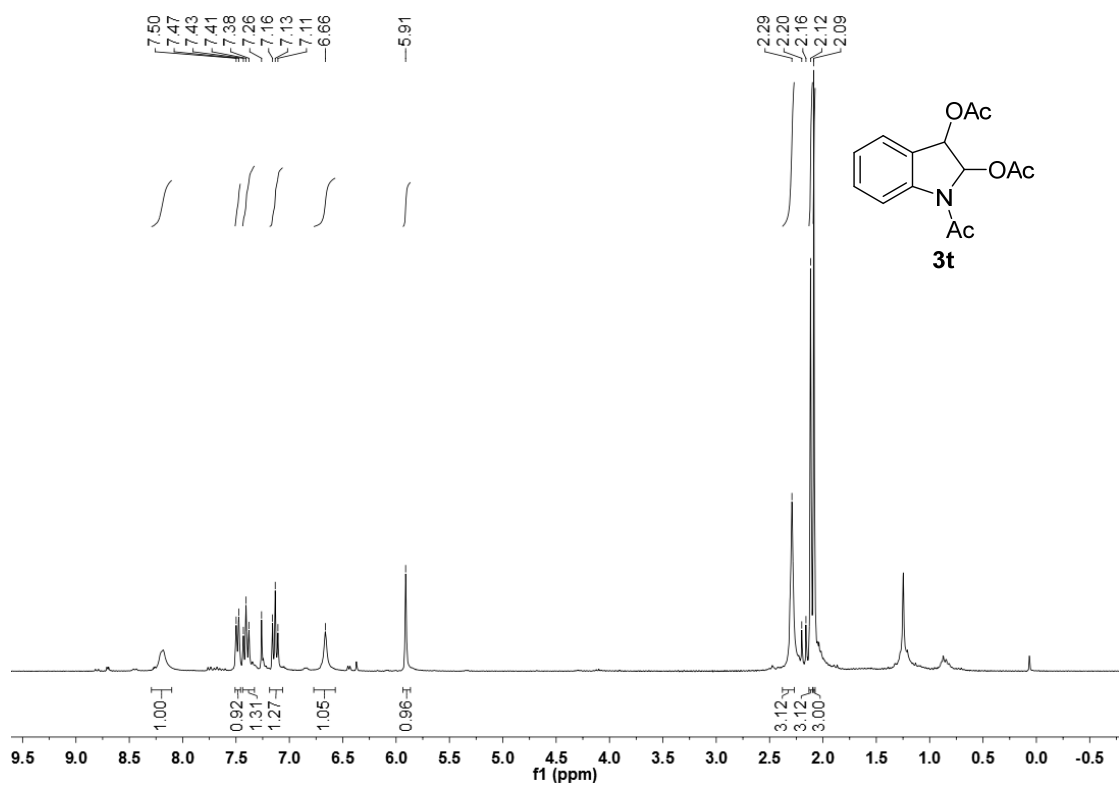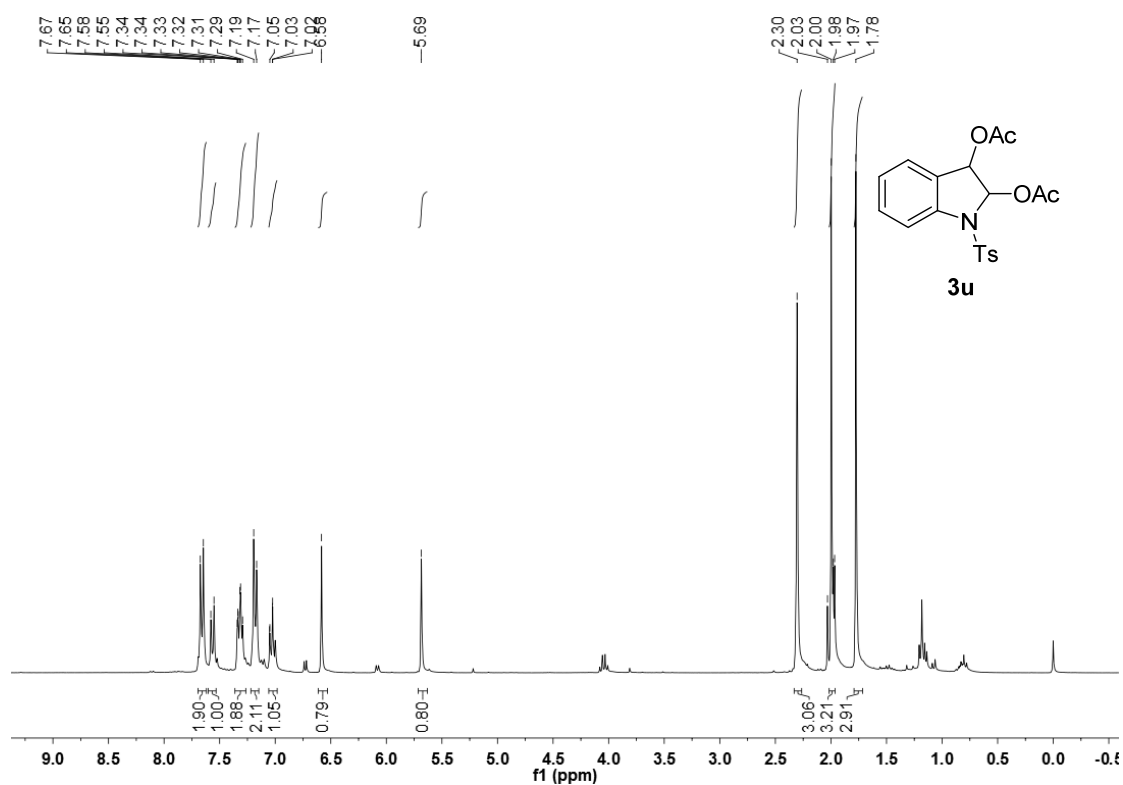

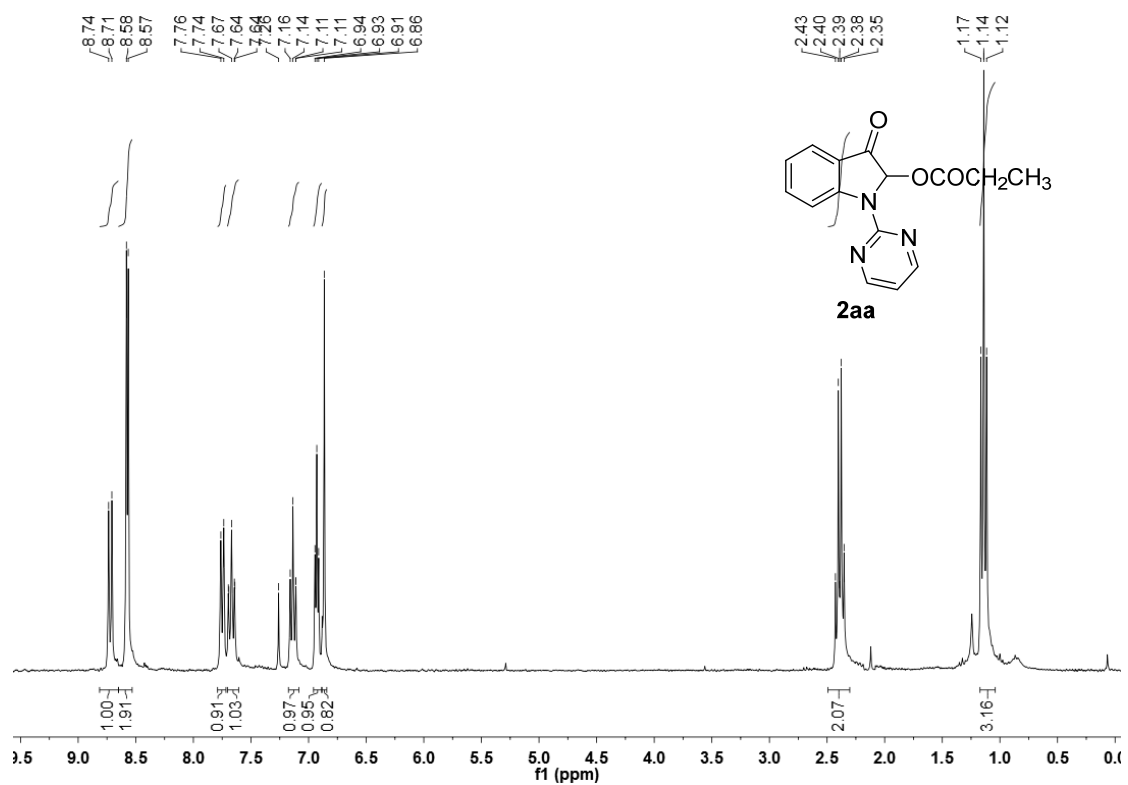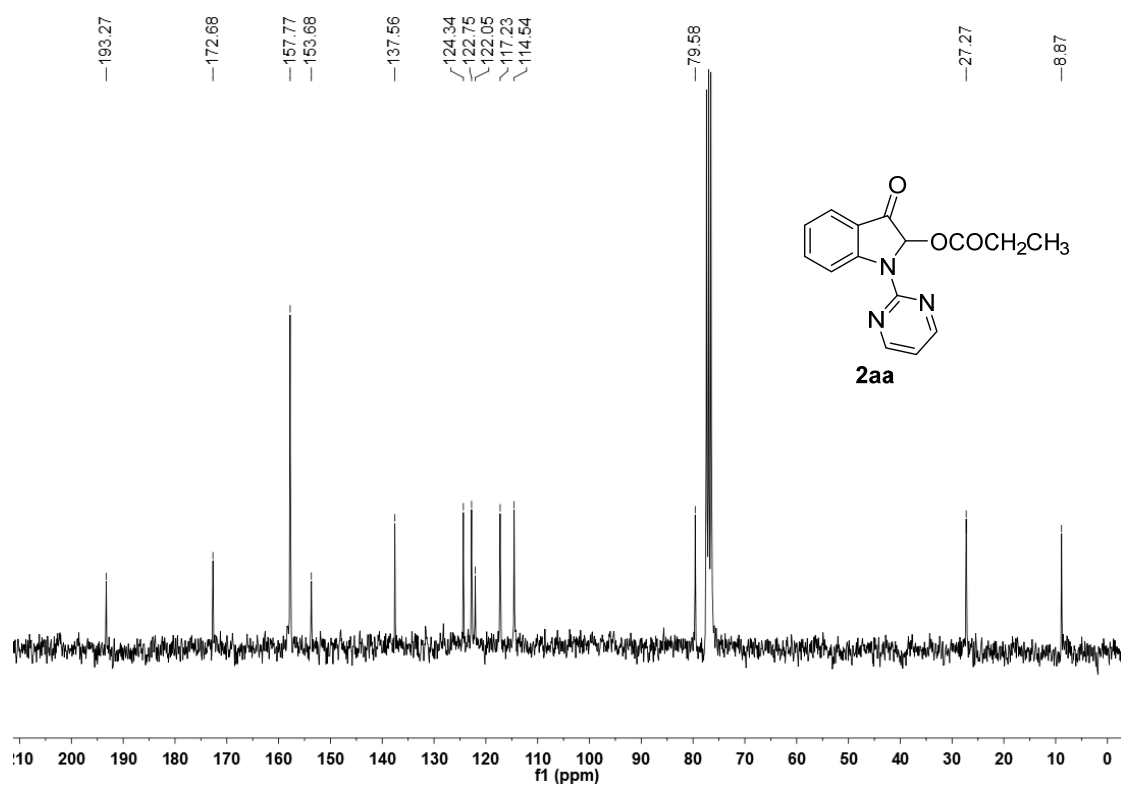

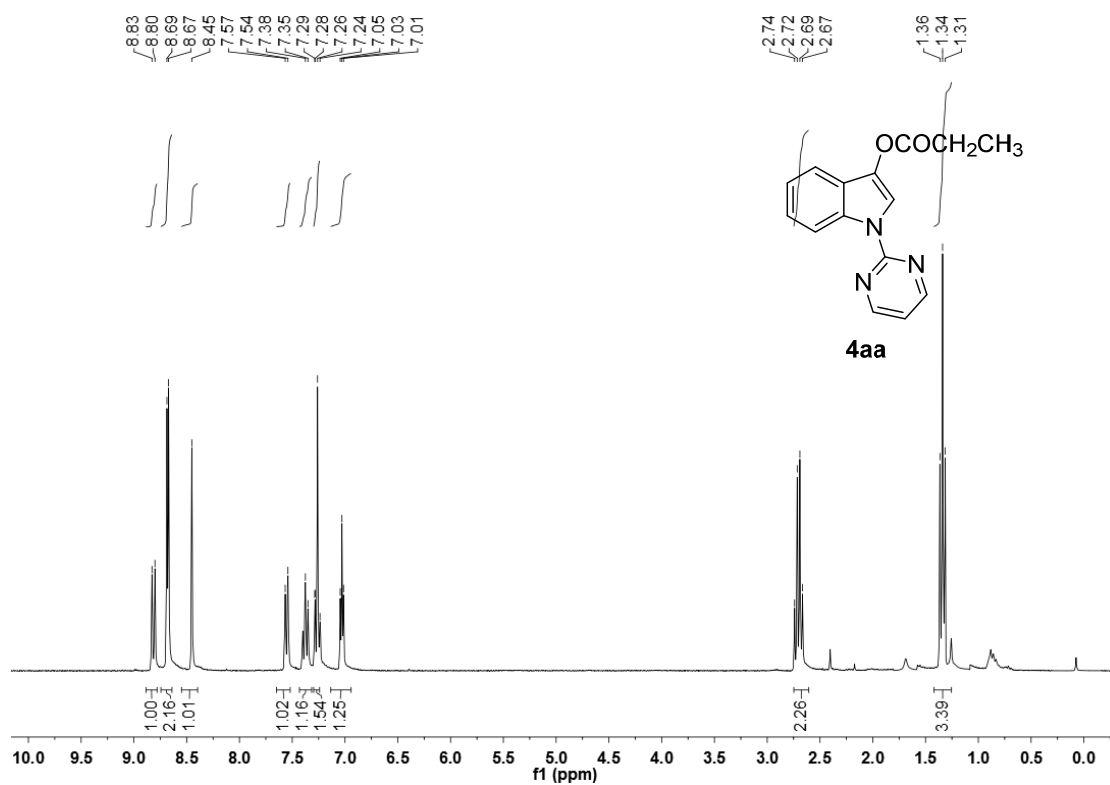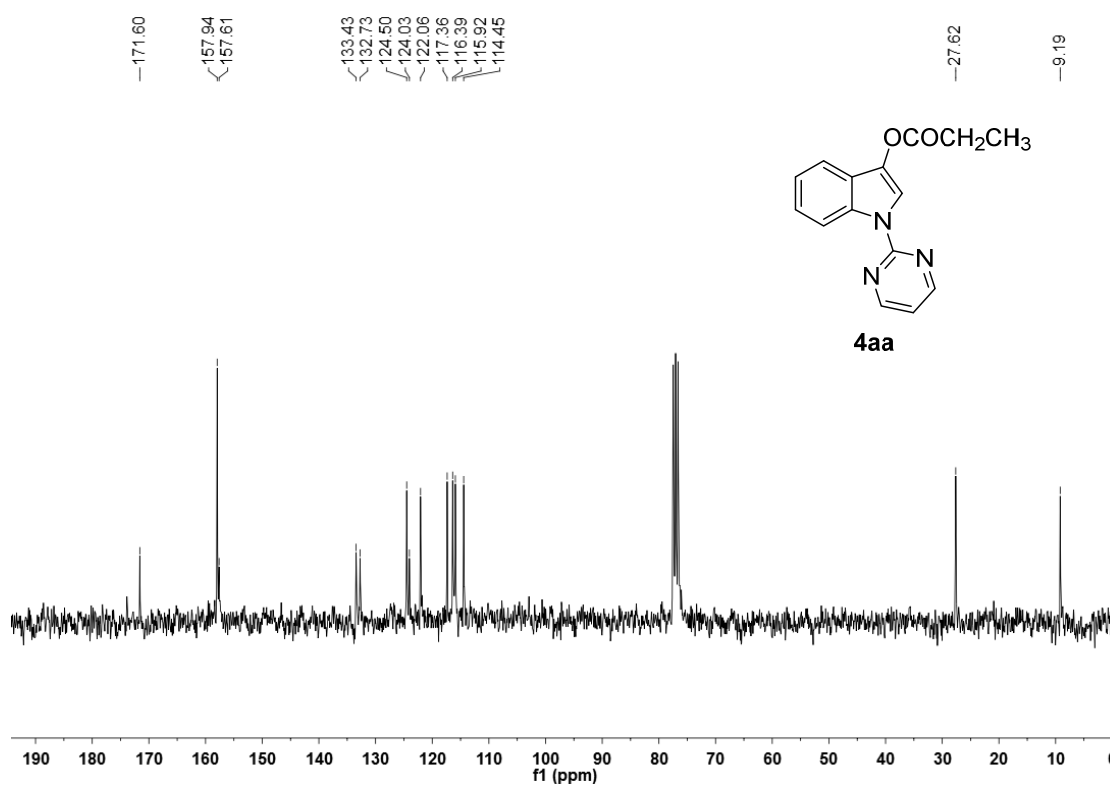

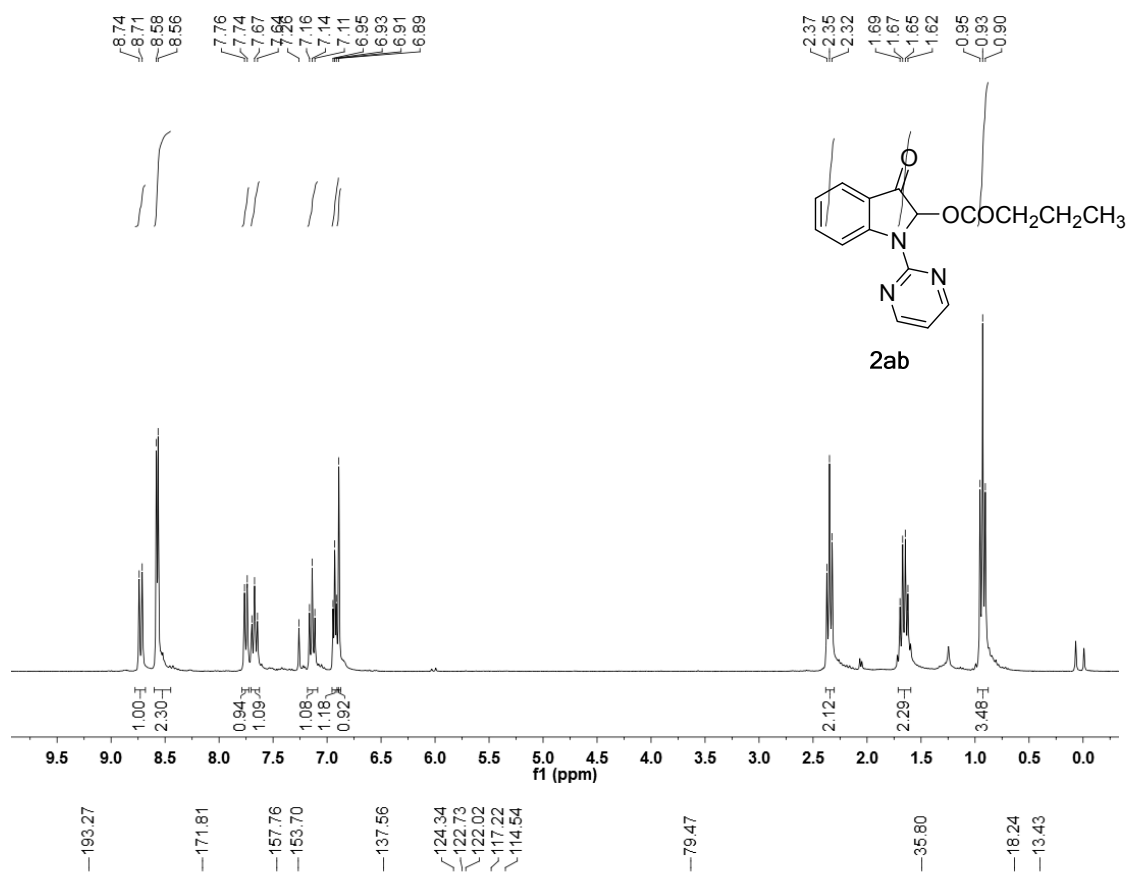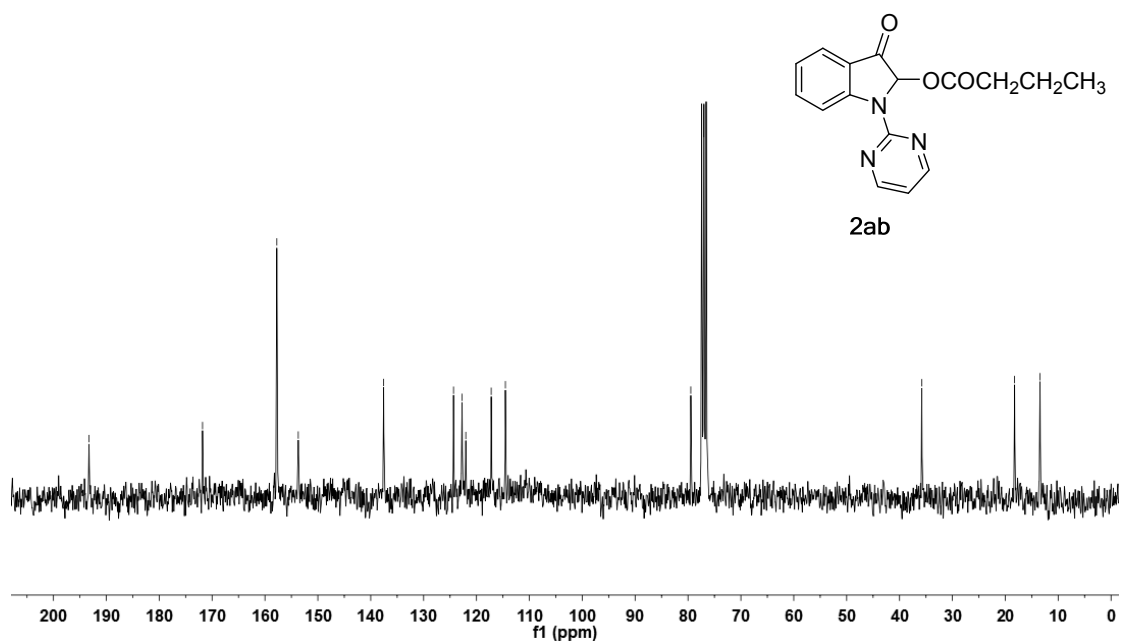



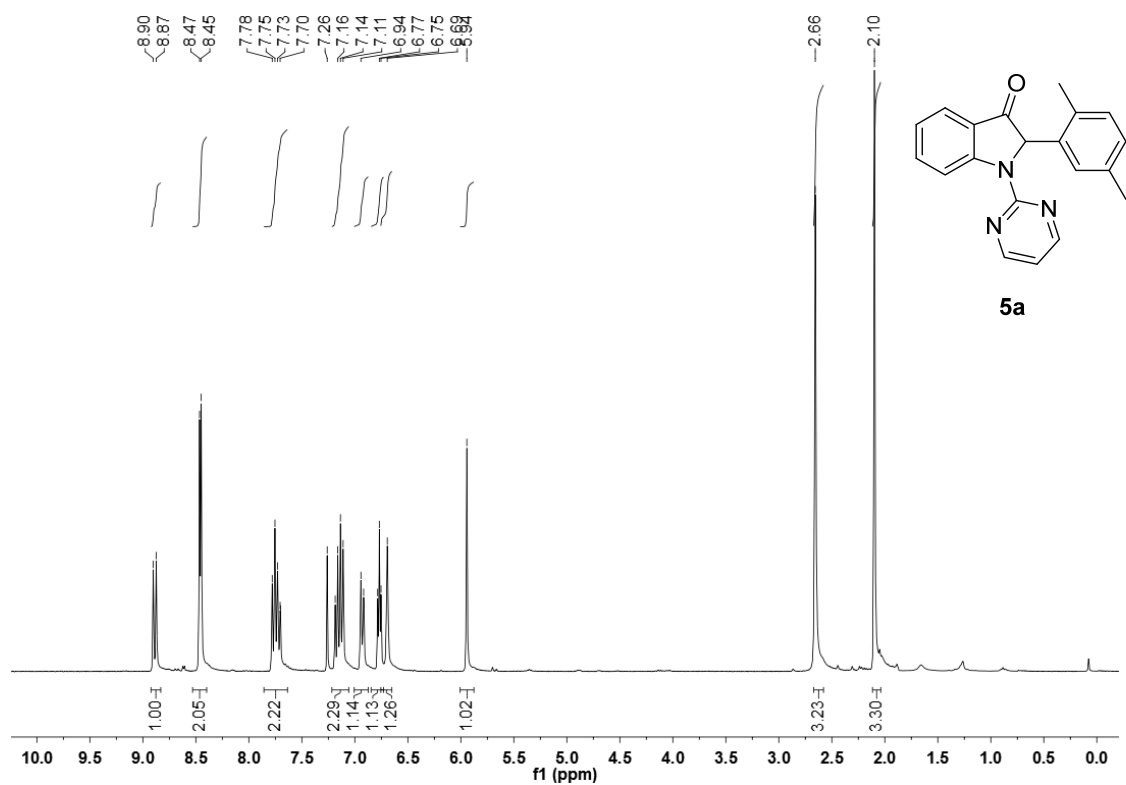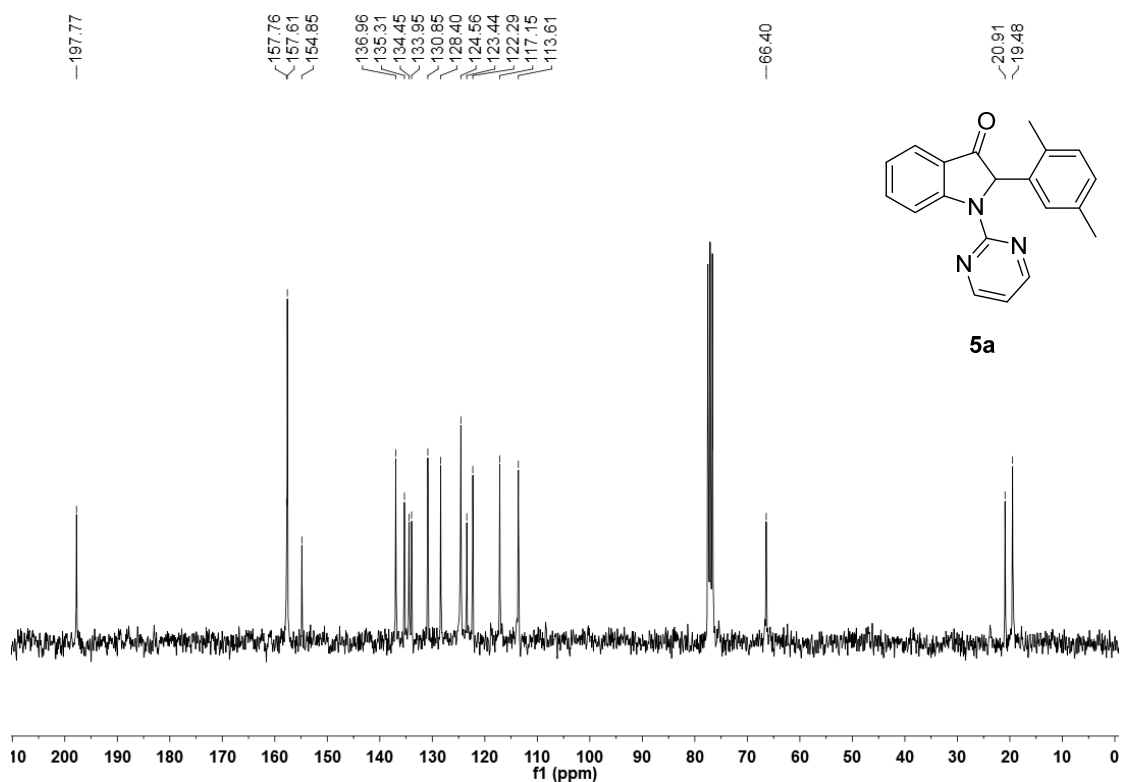

Supplement: c6ra19741h1.pdf [file c6ra19741h1.pdf]
